# Supplementary material for: Genome sequence and analysis of the Japanese morning glory Ipomoea nil
Source: PubMed Central journal article supplement (PMC5105172; doi:10.1038/ncomms13295), 2016-11-08
Supplement: ncomms13295-s1.pdf [file ncomms13295-s1.pdf]

**Supplementary Figures**

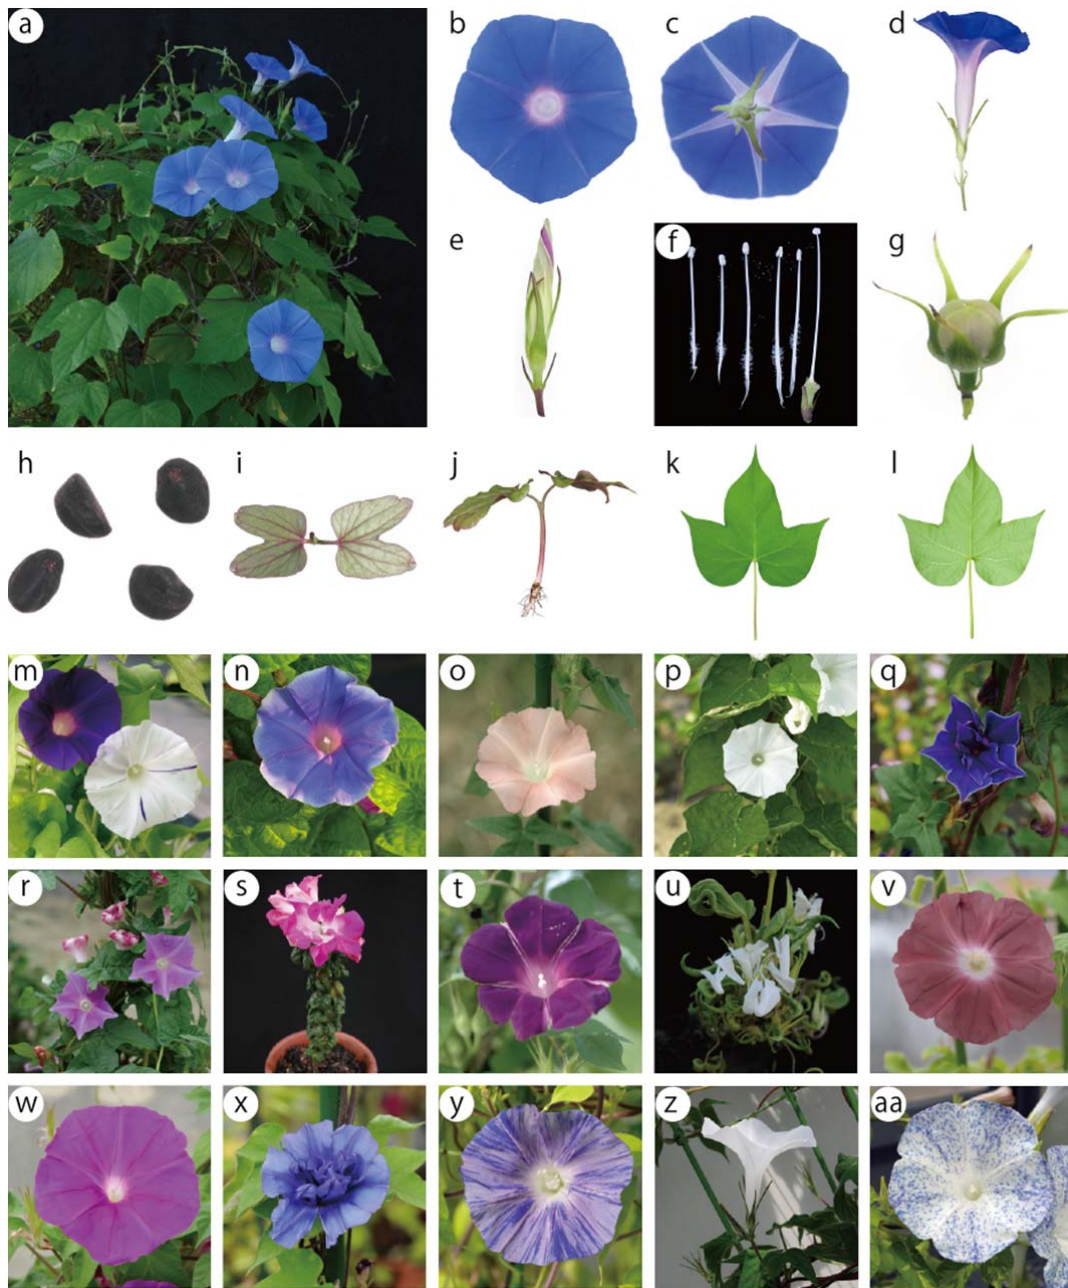

**Supplementary Figure S1 | The Japanese morning glory. (a-l)** The wild-type line Tokyo-kokei standard (TKS). **(a)** The individual used for whole genome sequencing. **(b)** Flower from the front. **(c)** Flower from the back. **(d)** Flower from the side. **(e)** Flower bud one day before flower opening. **(f)** Stamens (five on the left) and carpel

(farthest right). **(g)** Seed pod. **(h)** Seeds. **(i)** Seedling from above. **(j)** Side view of a seedling. **(k)** Leaf from the front. **(l)** Leaf from the back. **(m)** The Q1072 line carrying the recessive *a3-f* mutation that is the *Tpn1* insertion into the *DFR-B* gene for flower pigmentation. The mutant produces white flowers with pigmented spots or sectors (right) and sometimes produces fully pigmented flowers (left). The pigmentation patterns are caused by *Tpn1*-inducing somatic mutations and indicate that transposases TnpA and TnpD of *Tpn1* family elements are active. **(n-s)** Brassinosteroid-deficient mutants. **(n)** Q848 (*ct-1*). **(o)** Q853 (*ct-2*). **(p)** Q220 (*ct-w*). **(q)** Q708 (*s*). **(r)** Q721 (*s*). **(s)** Q837 (*ct-1, s*). **(t-aa)** The mutant lines carrying one of the recessive mutations that were mapped on the classic linkage map. The *cd, fe, dy, a3, mg, dp*, and *dk-2* mutations were assigned to classic LG1, LG2, LG3, LG4, LG5, LG6, and LG10, respectively. The recessive mutations of *c1* and *sp* were also assigned to LG3. In this study, LG3N with *dy* and LG3S containing *c1* and *sp* were found to correspond to different chromosomes (Supplementary Table S22). **(t)** Q557 (*cd*) showing partial transformation of floral petals into sepals. **(u)** Q459 (*fe*) showing alteration of organ polarity. **(v)** Q114 (*dy*) with dark-colored flowers. **(w)** AK62/Violet (*mg*) with reddish flowers. **(x)** Q426 (*dp*), producing double flowers. **(y)** Q531 (*dk-2*) with pale- and dull-colored flowers. **(z)** AK33 (*c1*), producing white flowers with red stems. **(aa)** AK30 (*sp*) showing speckled flowers. All *I. nil* lines are from the National BioResource Project (<http://www.shigen.nig.ac.jp/asagao/>).

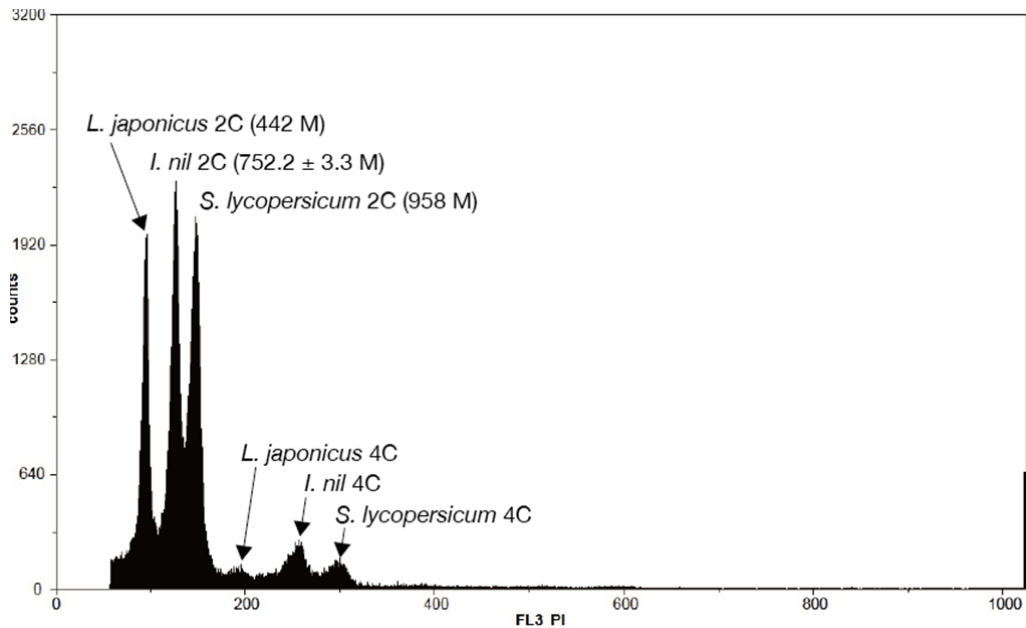

**Supplementary Figure S2. A representative histogram of flow cytometric analysis**

**for genome size estimation.** Young leaves from the Tokyo-kokei standard of *I. nil* and the standard species were separately chopped using a razor blade for 1 min in an extraction buffer. *Lotus japonicus* Gifu and *Solanum lycopersicum* cv Micro-Tom were chosen as standard species<sup>15,16</sup>. The extraction buffer was PBS (pH 7.2) with 0.1 % (v/v) Triton X-100 and 400 µg/ml of RNase A (QIAGEN). After 15 min of incubation, the extracts were filtered using a 20-µm CellTrics disposable filter (Partec). Extracts from the three species were mixed at an appropriate ratio, and the mixtures were stained with 20 µl of propidium iodide solution (ICyt) per 1 ml of each mixture. All procedures above were done on ice. The three mixtures prepared from independent leaves of the species were analyzed by a flow cytometer, CyFlow SL, equipped with a 532-nm laser and FloMax software (Partec). The estimated genome size of *I. nil* is shown with a standard error (n=3).

PacBio reads

**Step1** ↓ De novo assembly using HGAP3 followed by 2 rounds of polishing by Quiver

PacBio contigs (N50 = 1.83 Mb)

**Step2** ↓ Residual error correction using Illumina reads, removal of organellar sequences and removal of redundant sequences

Polished contigs (N50 = 1.82 Mb)

**Step3** ↓ Scaffolding with 15 and 20 kb Illumina mate-pair libraries using BESST scaffolder

Scaffolds (N50 = 4.08 Mb)

**Step4** ↓ Splitting of chimeric scaffolds using linkage maps

Split scaffolds (N50 = 2.89 Mb)

**Step5** ↓ Gap-filling using PBJelly

Gap-filled scaffolds (N50 = 3.72 Mb)

**Step6** ↓ Joining gaps with at least 1 kb flanking overlapping bases

Joined scaffolds (N50 = 3.72 Mb)

**Step7** ↓ Splitting of chimeric scaffolds using linkage maps

Final assembly (N50 = 2.88 Mb)

**Supplementary Figure S3. Assembly work-flow.** The assembly pipeline used for assembling the *I. nil* genome utilizing PacBio and Illumina sequence reads.

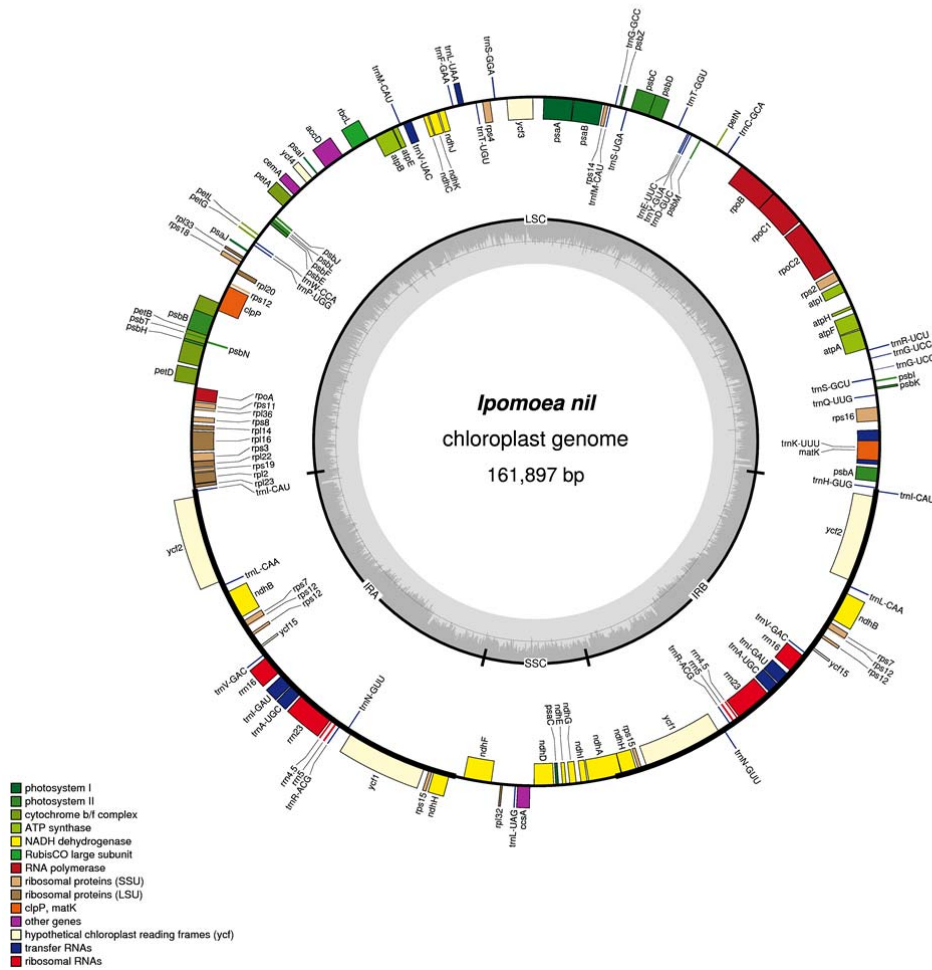

**Supplementary Figure S4. The chloroplast genome of *I. nil*.** The outer circle shows position of the genes including 88 protein coding, 38 tRNA, and 8 rRNA genes. The genes inside and outside the circle are transcribed in the clockwise and counterclockwise directions, respectively. The inner circle indicates the inverted repeats (IRA and IRB), small single-copy (SSC) and large single-copy (LSC) regions, and also shows the nucleotide content graph (G/C dark gray, A/T light gray).

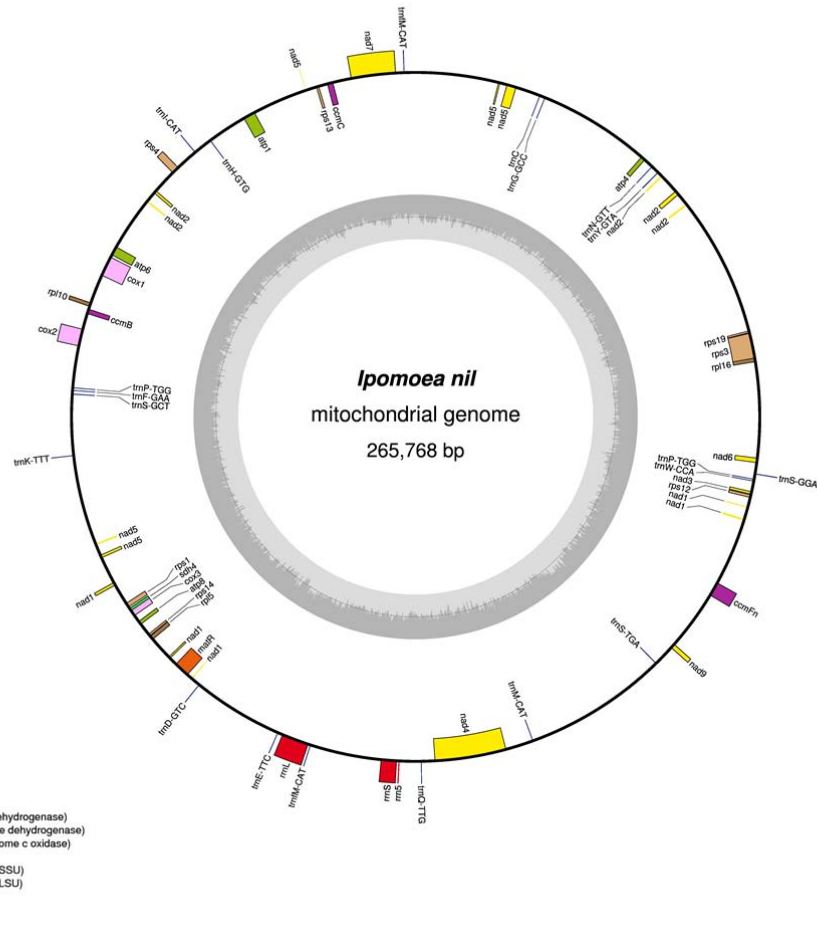

**Supplementary Figure S5. The mitochondrial genome of *I. nil*.** The outer circle shows position of the genes including 32 protein coding, 20 tRNA, and 3 rRNA genes. The genes inside and outside the circle are transcribed in the clockwise and counterclockwise directions, respectively. The pseudo genes for *ccmFc* and *mttB* found in the genome were removed from the map. The inner circle indicates the nucleotide content graph (G/C dark gray, A/T light gray).

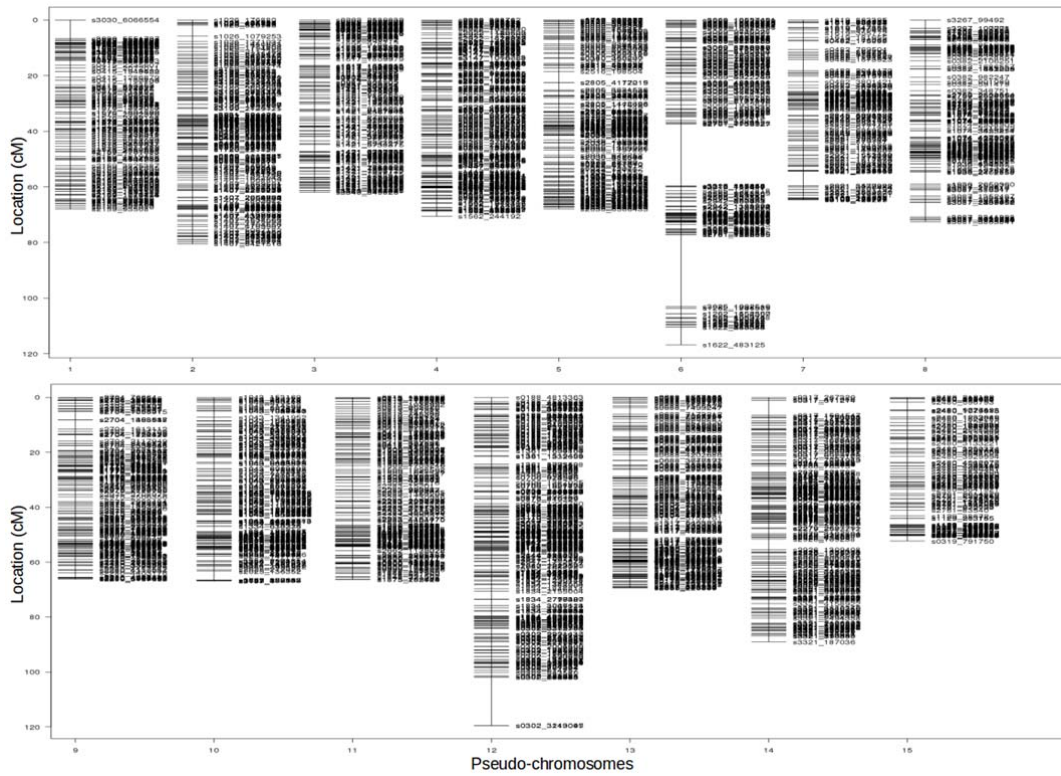

**Supplementary Figure S6. Fifteen linkage maps.** The markers correspond to scaffold names. For clarity of marker names, please refer to Supplementary Data 1.

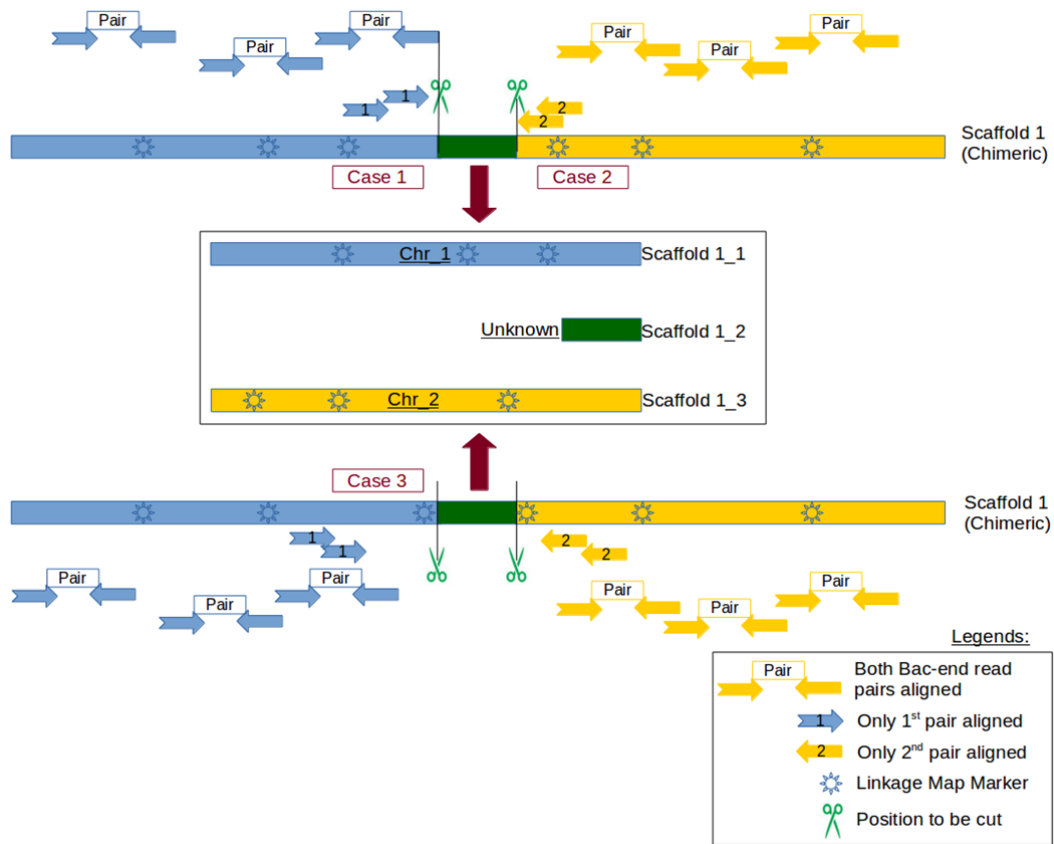

**Supplementary Figure S7. Mis-assembly breakage process.** Case 1 and 2 depicts breakage using BAC-end pair information. In case 1, the breakpoint is at the nearest complete BAC-end pair, and in case 2, the breakpoint is at the nearest BAC-end read, whose read-pair is in a different scaffold. Also, when there is not sufficient BAC-end read information, the SNP marker from the linkage maps was used as the breakpoint (Case 3). All cases were identified using disputes in linkage maps and were split into 3 separate scaffolds. The first and last scaffolds were assigned to corresponding chromosomes from the linkage map.



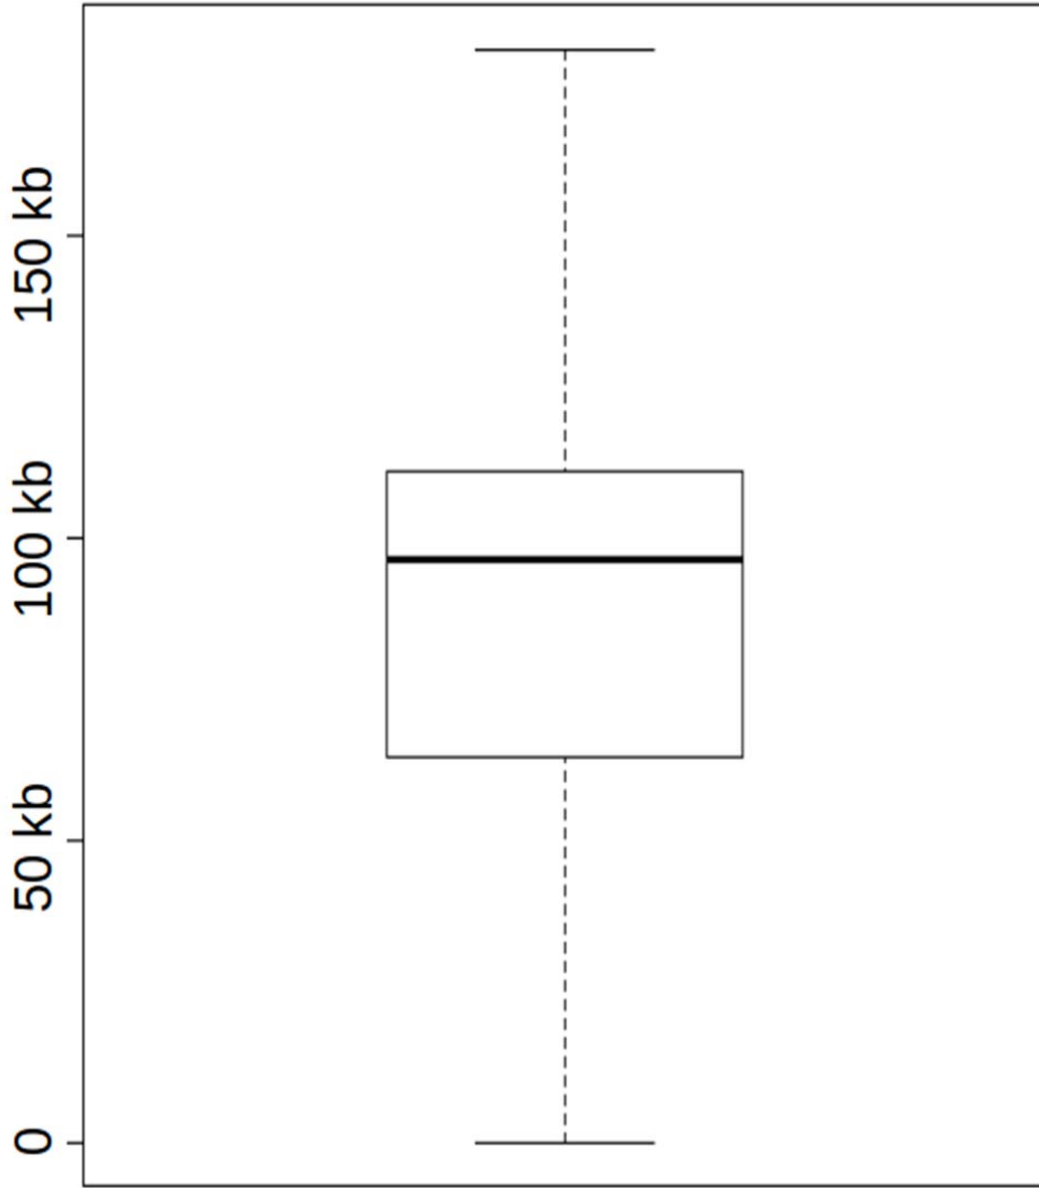

**Supplementary Figure S8. Histogram of the observed BAC-end inserts.** The BAC-end reads were aligned against the scaffolds, and the insert lengths between the pairs were calculated, and a histogram was plotted after removing outliers.

```

a      TTATAAAATAGTGTAATACAATTCTCTTTGCAC-ATCTATACTATATATAAAAAACAAAAT
c      TTATAAAATAGTGTAATACAATTCCCTTTGCAC-ATCTATACTATATATAAAAAACAAAAT
i      TTTTAAAATAGTGTAATACAATTCCCTTTGTAC-ATCTATACTATATATAAATAACAAAAT
h      TTATAAAATAGTGTAATACAATTCCCTTTGCACAATCTATACTATATATAAATAACAAAAT
e      TTATAAAATAGTGTAATACAATTCTCTATTGCA--ATCTATACTATATATAAAAAACAAAAT
f      TTATAAAATAGTGTAATACAATTCCCTATTCTA--ATCTATACTATATATAAATAACAAAAT
b      TTATAAAATAGTGTAATACAATTCCTTTGCAC-ATCTATACTATATATAAAAAACAAAAT
j      TTTTAAAATAGTGTAATACAATTCCCTTTGTAC-ATCTTTACTATATATAAATAAATAAAT
g      TTTTAAAATAGTGTAATATAATTCCCTTTGTAC-ATCTATACTATATATAAATAAATAAAT
d      TTATAAAATA-TGTAATAATAATTCATTTGCAC-ATCTATACTATATATAAATAAATAAAT
      ** ***** *****.****** ** .* **** ********** **.******

a      CCTGAAATTTTAACTTCCCGCCCAATTCCCTAAAAAATCTCTCTTCCCAATAAAAATATATT
c      TCTGAAATTTTAACTTTCCGCCCAATTCCCTAAAAAATCTCTCTTCCCAATAAAAATATATT
i      CCTGGAATTTTAACTTCCCGCCCAATTCCCTAAAAAATTTCTCTTCCCAATAAAAATATATT
h      CCTGAAATTTTAACTTTCCGCCCAATTCCCTAAAAAATCTCTCTTCCCAATAAAAATATATT
e      CCTGAAATTTTAACTTCCCGCCCAATTCCCTAAAAAATCTCTCTTCCCAATAAAAATATATT
f      CCTAAAATTTTAACTTCCCGCCCAATTCCCTAAAAAATCTCTCTTCCCTCATAAAAATATATT
b      CCATAAATTTTAACTTTCCGCCCAATTCCCTAAAAAATCTCTCTTCCCAATAAAAATATATT
j      CCTGGAATTTTAACTTCCCG-CCAATTCCCTAAAAAATCTCTCTTCCCAATAAAAATATATT
g      CCTGGAATTTTAACTTACCGCTATATTCCCTAAAAAATCTCTATTCCCAATAAAAATATATT
d      CCTAAAATTTTAACTTCCCGTCAAATTTATAAAAATATCTCTTACCAATAAAAATATATT
      .* .***** ***** ** . ***. ***** **.* ** * . **********

a      GATTTCTACTTTCCCATTCGTACAATAAATCTGGGTAAAAATCTATTCTAAAA
c      GATTTCTACTTTCCATTCGTACAATAAATCTGGGTAAAAATCTATTCTAAAA
i      GATTTCTACTTTCCCATTCGTACAATAAATCTGGGTAAAAATCTATTCTAAAA
h      GATTTCTACTTTCCCATTCGTACAATAAATCTGGGTAAAAATCTATTCTAAAA
e      GATTTCTACTTTCCCATTCGTACAATAAATCTGGGTAAAAATCTATTCTAATA
f      GATTTCTACTTTCCCATTCGTACAATAAATCTGCGATAAAAATCTATTCTAATA
b      GATTTCAACTATCCCATTCGTACAATAAATCTGTGTA AAAATCTATTCTAAA-
j      GATTTCTACTTTCCCATTCGTACAATAAATCTGTGTA AAAATCTATTCTTAAA
g      GATTTCTACTTTCCCATTCGTACAATAAATCTTGGTAAAAATCTATTCTTAAA
d      AATTTCTACTTTCCCATTAGTAAAATAGTT-TGAGTAAAAATCTATTCTAAAA
      .***** ** *.*.* ** ** **.* ** * * ********** *

```

**Supplementary Figure S9. Putative consensus of the centromeric monomer repeats.** MAFFT was used to construct multiple sequence alignment of ten random putative 173 bp centromeric monomer repeat sequences.

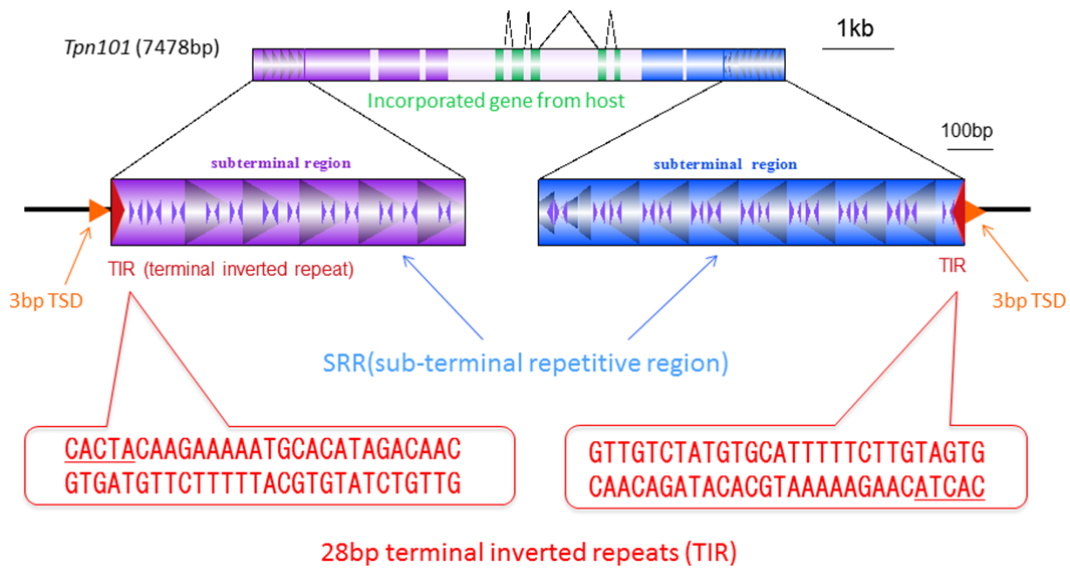

**Supplementary Figure S10. Structure of a *Tpn1* family transposon.** The first and last identical 28 bp represent Terminal Inverted Repeats (TIRs) across all the *Tpn1* transposons, flanked by typical 3-bp Transposon Site Duplications (TSDs). The TIRs are followed by sub-terminal repetitive regions (SRRs) and the region in-between can have incorporated genes from the host.

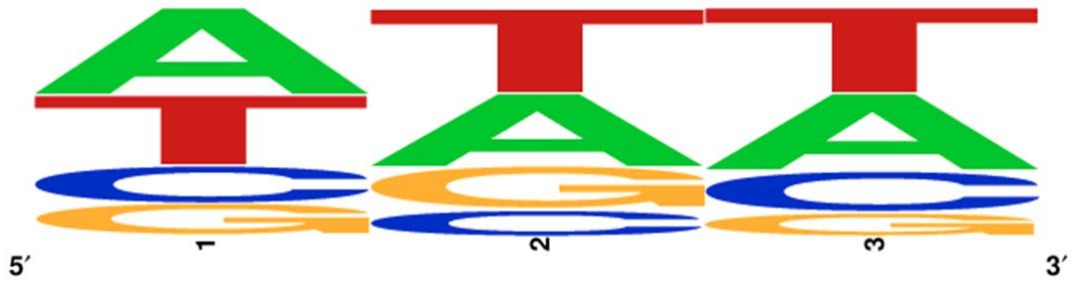

**Supplementary Figure S11. Observed TSD motifs.** The 3-bp TSDs of *Tpn1* transposons were used to create a motif pattern, which shows that TSDs are preferential to A and T nucleotides.

a

|                 |      |                                                                                                        |                                                          |      |
|-----------------|------|--------------------------------------------------------------------------------------------------------|----------------------------------------------------------|------|
| TpnA1_TnpD      | 1    | --MDKEWMSKDRLCYEEVGVESFLQFAKKNVADPNPNS----                                                             | ISCPAICGNLRKQPLDTRAHLYRNGMDGTYSWIIWHGKATLN--NSIDDGGLIRGE | 92   |
| TpnA2_TnpD      | 1    | --MDKEWMSKDRLCYEEVGVESFLQFAKKNVADPNPNS----                                                             | ISCPAICGNLRKQPLDTRAHLYRNGMDGTYSWIIWHGKATLN--NSIDDGGLIRGE | 92   |
| TpnA3_TnpD      | 1    | --MDKEWMSKDRLCYEEVGVESFLQFAKKNVADPNPNS----                                                             | ISCPAICGNLRKQPLDTRAHLYRNGMDGTYSWIIWHGKATLN--NSIDDGGLIRGE | 92   |
| TpnA4_TnpD      | 1    | --MDKEWMSKDRLCYEEVGVESFLQFAKKNVADPNPNS----                                                             | ISCPAICGNLRKQPLDTRAHLYRNGMDGTYSWIIWHGKATLN--NSIDDGGLIRGE | 92   |
| Q1072_mRNA_TnpD | 1    | --MDKEWMSKDRLCYEEVGVESFLQFAKKNVADPNPNS----                                                             | ISCPAICGNLRKQPLDTRAHLYRNGMDGTYSWIIWHGKATLN--NSIDDGGLIRGE | 92   |
| Tam1_TnpD       | 1    | -----MHKSRLEETEYENGLDQDFADFNVLCLANG-----                                                               | II CPCKQCNALMWRDRETAKEHLIDGFIKGYTHWIIHGGSNSQNNIQERLWTFE  | 88   |
| En/Spm_TnpD     | 1    | MSDRRRAMYDGFDSVTHGSDAWLRVADEFVALAFVGDARLARLPCICRNLVRLKKVLESHYIFKFGFMPNVLVWHEHGE--VDHTIESDGGQDIRMFE     | 99                                                       | 99   |
| TpnA1_TnpD      | 93   | EHN-----RVDENPIDMVN--AADEYVEDPNKFSKLLLEDAEKPLVGCCTFTFKLSAVVKLYLNKAKYSWSDASFDTLDDLFKMLPTDN--VLPSSLY     | 182                                                      | 182  |
| TpnA2_TnpD      | 93   | EHN-----RVDENPIDMVN--AADEYVEDPNKFSKLLLEDAEKPLVGCCTFTFKLSAVVKLYLNKAKYSWSDASFDTLDDLFKMLPTDN--VLPSSLY     | 182                                                      | 182  |
| TpnA3_TnpD      | 93   | EHN-----RVDENPIDMVN--AADEYVEDPNKFSKLLLEDAEKPLVGCCTFTFKLSAVVKLYLNKAKYSWSDASFDTLDDLFKMLPTDN--VLPSSLY     | 182                                                      | 182  |
| TpnA4_TnpD      | 93   | EHN-----RVDENPIDMVN--AADEYVEDPNKFSKLLLEDAEKPLVGCCTFTFKLSAVVKLYLNKAKYSWSDASFDTLDDLFKMLPTDN--VLPSSLY     | 182                                                      | 182  |
| Q1072_mRNA_TnpD | 93   | EHN-----RVDENPIDMVN--AADEYVEDPNKFSKLLLEDAEKPLVGCCTFTFKLSAVVKLYLNKAKYSWSDASFDTLDDLFKMLPTDN--VLPSSLY     | 182                                                      | 182  |
| Tam1_TnpD       | 89   | DMHNLVHDAFVGEDDINSEEEPEEENEAEAKTFYKLLDDQQLVPGCKDFSRFLRIVRLFHLKCLGKSNKTFMMLLELKAKEFPEQNTSLPKSY          | 188                                                      | 188  |
| En/Spm_TnpD     | 100  | EMLD-----DIRNEYFDLQN-----NQAFPEDVREFYKLEAEAKHEHG--TNVSVLQVVTFLMAMKSKYTFSNKCYNDIVKLIIDISPPNH--NMPKLD    | 187                                                      | 187  |
| TpnA1_TnpD      | 183  | EAKRSVALGMDYEKIHACPNDCILYRKENANCTNCPTCGTSRHWIKGNSKISIG-----                                            | VPAKVLWYFPPIDRFQRMFRSKDISKELTWHSDMKVC                    | 274  |
| TpnA2_TnpD      | 183  | EAKRSVALGMDYEKIHACPNDCILYRKENANCTNCPTCGTSRHWIKGNSKISIG-----                                            | VPAKVLWYFPPIDRFQRMFRSKDISKELTWHSDMKVC                    | 274  |
| TpnA3_TnpD      | 183  | EAKRSVALGMDYEKIHACPNDCILYRKENANCTNCPTCGTSRHWIKGNSKISIG-----                                            | VPAKVLWYFPPIDRFQRMFRSKDISKELTWHSDMKVC                    | 274  |
| TpnA4_TnpD      | 183  | EAKRSVALGMDYEKIHACPNDCILYRKENANCTNCPTCGTSRHWIKGNSKISIG-----                                            | VPAKVLWYFPPIDRFQRMFRSKDISKELTWHSDMKVC                    | 274  |
| Q1072_mRNA_TnpD | 183  | EAKRSVALGMDYEKIHACPNDCILYRKENANCTNCPTCGTSRHWIKGNSKISIG-----                                            | VPAKVLWYFPPIDRFQRMFRSKDISKELTWHSDMKVC                    | 274  |
| Tam1_TnpD       | 189  | EYQKIGALGLTCVKIDACPNDCMLYRKEHANDDACHVNTSRYIEGENNVSSEASSSKCRVPAKVLRYFPKLPRLQRLTSSKTASFMWRHKEERTK        | 288                                                      | 288  |
| En/Spm_TnpD     | 188  | HCKKLVAAGLGMNYQRIDACEDNCLMFLKHEHENTHCHCSKRSRYIAVLEDEGNEVIT-----                                        | KVPIKQLRYMPTLPRKRLFLNQETAKQMRHWHKEGRD                    | 282  |
| TpnA1_TnpD      | 275  | D-----GYLRHPADAPCWRVTDEMMPDFANEPNRLRLALSADGINPHSVMSSTYSWCFVIMITYNLPWPMCKRKFMMLSLISGPKQPGNDIDVYLAFLID   | 371                                                      | 371  |
| TpnA2_TnpD      | 275  | D-----GYLRHPADAPCWRVTDEMMPDFANEPNRLRLALSADGINPHSVMSSTYSWCFVIMITYNLPWPMCKRKFMMLSLISGPKQPGNDIDVYLAFLID   | 371                                                      | 371  |
| TpnA3_TnpD      | 275  | D-----GYLRHPADAPCWRVTDEMMPDFANEPNRLRLALSADGINPHSVMSSTYSWCFVIMITYNLPWPMCKRKFMMLSLISGPKQPGNDIDVYLAFLID   | 371                                                      | 371  |
| TpnA4_TnpD      | 275  | D-----GYLRHPADAPCWRVTDEMMPDFANEPNRLRLALSADGINPHSVMSSTYSWCFVIMITYNLPWPMCKRKFMMLSLISGPKQPGNDIDVYLAFLID   | 371                                                      | 371  |
| Q1072_mRNA_TnpD | 275  | D-----GYLRHPADAPCWRVTDEMMPDFANEPNRLRLALSADGINPHSVMSSTYSWCFVIMITYNLPWPMCKRKFMMLSLISGPKQPGNDIDVYLAFLID   | 371                                                      | 371  |
| Tam1_TnpD       | 289  | D-----GQLRHGEGSDFLYHAEHQHAFDAPNRIPLGIALGDFNFTKYSVAHSFWVILFPNIPWIMKAEFFLFLTLCTHPPRRQKAFD--GKQFED        | 385                                                      | 385  |
| En/Spm_TnpD     | 283  | GQDDPVNHPDSGEAWQALDRDFEFARDPDRVRLGLSDTCFTYNNSTYSWCFVIMITYNLPWPMCKRKFMMLSLISGPKQPGNDIDVYLAFLID          | 382                                                      | 382  |
| TpnA1_TnpD      | 372  | DLKVLWEEGIEAYDAYRQEKFLKAVLLWTFNDIFPAYGNLGGCTVKGYHACPICGENTYAKRLKHSKMAFTG--HRRFLCKTHPYRRQKAFD--GKQFED   | 469                                                      | 469  |
| TpnA2_TnpD      | 372  | DLKVLWEEGIEAYDAYRQEKFLKAVLLWTFNDIFPAYGNLGGCTVKGYHACPICGENTYAKRLKHSKMAFTG--HRRFLCKTHPYRRQKAFD--GKQFED   | 469                                                      | 469  |
| TpnA3_TnpD      | 372  | DLKVLWEEGIEAYDAYRQEKFLKAVLLWTFNDIFPAYGNLGGCTVKGYHACPICGENTYAKRLKHSKMAFTG--HRRFLCKTHPYRRQKAFD--GKQFED   | 469                                                      | 469  |
| TpnA4_TnpD      | 372  | DLKVLWEEGIEAYDAYRQEKFLKAVLLWTFNDIFPAYGNLGGCTVKGYHACPICGENTYAKRLKHSKMAFTG--HRRFLCKTHPYRRQKAFD--GKQFED   | 469                                                      | 469  |
| Q1072_mRNA_TnpD | 372  | DLKVLWEEGIEAYDAYRQEKFLKAVLLWTFNDIFPAYGNLGGCTVKGYHACPICGENTYAKRLKHSKMAFTG--HRRFLCKTHPYRRQKAFD--GKQFED   | 469                                                      | 469  |
| Tam1_TnpD       | 386  | EQLQELWG--GVNTYDASAKENFNRAALLWTFNDIFPAYGNLGGCTVKGYHACPICGENTYAKRLKHSKMAFTG--HRRFLCKTHPYRRQKAFD--GKQFED | 482                                                      | 482  |
| En/Spm_TnpD     | 383  | ELKMLWQ--GVEAYDSHLKCCFTLRAAYLWSHDLAYGIFSGWCVHGLRCPICMGDSQAYRLEHCKEFTFFDVRHLLPYNHPFRKDTKSFRRGKVRD       | 481                                                      | 481  |
| TpnA1_TnpD      | 470  | LAPKPLSGHDVLTKEGICNSWCKNSGKLNNAKRKISSEWCWKKSIFFLELYWKHLHVRHVDVMHIEKNVCESIICTLLDIPGKTKDGAARLDLVEMV      | 569                                                      | 569  |
| TpnA2_TnpD      | 470  | LAPKPLSGHDVLTKEGICNSWCKNSGKLNNAKRKISSEWCWKKSIFFLELYWKHLHVRHVDVMHIEKNVCESIICTLLDIPGKTKDGAARLDLVEMV      | 569                                                      | 569  |
| TpnA3_TnpD      | 470  | LAPKPLSGHDVLTKEGICNSWCKNSGKLNNAKRKISSEWCWKKSIFFLELYWKHLHVRHVDVMHIEKNVCESIICTLLDIPGKTKDGAARLDLVEMV      | 569                                                      | 569  |
| TpnA4_TnpD      | 470  | LAPKPLSGHDVLTKEGICNSWCKNSGKLNNAKRKISSEWCWKKSIFFLELYWKHLHVRHVDVMHIEKNVCESIICTLLDIPGKTKDGAARLDLVEMV      | 569                                                      | 569  |
| Q1072_mRNA_TnpD | 470  | LAPKPLSGHDVLTKEGICNSWCKNSGKLNNAKRKISSEWCWKKSIFFLELYWKHLHVRHVDVMHIEKNVCESIICTLLDIPGKTKDGAARLDLVEMV      | 569                                                      | 569  |
| Tam1_TnpD       | 483  | RAPIALTGDMVEEITGFNIKFGK---KVDNDPTLPLN--WKKRSIFLVDYKDSLLRHNFVMHIEKNVCESIICTLLDIPGKTKDGHNSRLDKDMGI       | 578                                                      | 578  |
| En/Spm_TnpD     | 482  | GPPRRQGENIMRQHRDLKPGVGG-----RFQYGYKEHNTWHSIFWELPYTKALLPHNIDLMHQERNVAESIIMCFDFTGQTKDNMARRDLAELCD        | 576                                                      | 576  |
| TpnA1_TnpD      | 570  | RMEIAPKQGEK--RTFLPPACVTLKDEKKVVCNSLLHMVPSGYSNVRNLVNVKELKLVGLKSHDCHTFMQQLLPAIRGLVLPKHRYAITRLCFFVNV      | 668                                                      | 668  |
| TpnA2_TnpD      | 570  | RMEIAPKQGEK--RTFLPPACVTLKDEKKVVCNSLLHMVPSGYSNVRNLVNVKELKLVGLKSHDCHTFMQQLLPAIRGLVLPKHRYAITRLCFFVNV      | 668                                                      | 668  |
| TpnA3_TnpD      | 570  | RMEIAPKQGEK--RTFLPPACVTLKDEKKVVCNSLLHMVPSGYSNVRNLVNVKELKLVGLKSHDCHTFMQQLLPAIRGLVLPKHRYAITRLCFFVNV      | 668                                                      | 668  |
| TpnA4_TnpD      | 570  | RMEIAPKQGEK--RTFLPPACVTLKDEKKVVCNSLLHMVPSGYSNVRNLVNVKELKLVGLKSHDCHTFMQQLLPAIRGLVLPKHRYAITRLCFFVNV      | 668                                                      | 668  |
| Q1072_mRNA_TnpD | 570  | RMEIAPKQGEK--RTFLPPACVTLKDEKKVVCNSLLHMVPSGYSNVRNLVNVKELKLVGLKSHDCHTFMQQLLPAIRGLVLPKHRYAITRLCFFVNV      | 668                                                      | 668  |
| Tam1_TnpD       | 579  | RSELHPILESQHYLPACACTMSKKEEIVFELKTVNVDGYASNISRRVQLKPNKISGLKSHDHIIMQQLLPAIRGLVLPKHRYAITRLCFFVNV          | 678                                                      | 678  |
| En/Spm_TnpD     | 577  | RPHLELRKNSGSESRPQVCLKQRESEIFQWKLKREFDPDYAAIKKAWLDTCKLVLKSHDHYHILIELVWVDFYSPDWKIFAEIYKQ                 | 676                                                      | 676  |
| TpnA1_TnpD      | 669  | ICSKVIDSSKLDALQDEIVITTLCLLEKIFPPSFFDIMVHLTVHVRVREKLCGPVWYRMYPFERYMKILKGYRNRNRPEGGIABCYISEAEIIFCSEYL    | 768                                                      | 768  |
| TpnA2_TnpD      | 669  | ICSKVIDSSKLDALQDEIVITTLCLLEKIFPPSFFDIMVHLTVHVRVREKLCGPVWYRMYPFERYMKILKGYRNRNRPEGGIABCYISEAEIIFCSEYL    | 768                                                      | 768  |
| TpnA3_TnpD      | 669  | ICSKVIDSSKLDALQDEIVITTLCLLEKIFPPSFFDIMVHLTVHVRVREKLCGPVWYRMYPFERYMKILKGYRNRNRPEGGIABCYISEAEIIFCSEYL    | 768                                                      | 768  |
| TpnA4_TnpD      | 669  | ICSKVIDSSKLDALQDEIVITTLCLLEKIFPPSFFDIMVHLTVHVRVREKLCGPVWYRMYPFERYMKILKGYRNRNRPEGGIABCYISEAEIIFCSEYL    | 768                                                      | 768  |
| Q1072_mRNA_TnpD | 669  | ICSKVIDSSKLDALQDEIVITTLCLLEKIFPPSFFDIMVHLTVHVRVREKLCGPVWYRMYPFERYMKILKGYRNRNRPEGGIABCYISEAEIIFCSEYL    | 768                                                      | 768  |
| Tam1_TnpD       | 677  | ICSAKESKMLMLRFEKIEIVLVCKMEKVFPPGFNMQHLHVPWALVGGPQFRMYSQERELKLRGMVRNKARVGGCIAEAFAREITLFSSKYF            | 742                                                      | 742  |
| En/Spm_TnpD     | 679  | LCAKELVQIPSTFQEVVTRRPLSGAQVQISIQEWEQSHRYLLANDVEIDQYAKEHKAHLKALRGKVRTEKGLLDEHNRTFINWLRDRVGRAINDSTHEI    | 776                                                      | 776  |
| TpnA1_TnpD      | 769  | TNVQTVGIPSTFQEVVTRRPLSGAQVQISIQEWEQSHRYLLANDVEIDQYAKEHKAHLKALRGKVRTEKGLLDEHNRTFINWLRDRVGRAINDSTHEI     | 868                                                      | 868  |
| TpnA2_TnpD      | 769  | TNVQTVGIPSTFQEVVTRRPLSGAQVQISIQEWEQSHRYLLANDVEIDQYAKEHKAHLKALRGKVRTEKGLLDEHNRTFINWLRDRVGRAINDSTHEI     | 868                                                      | 868  |
| TpnA3_TnpD      | 769  | TNVQTVGIPSTFQEVVTRRPLSGAQVQISIQEWEQSHRYLLANDVEIDQYAKEHKAHLKALRGKVRTEKGLLDEHNRTFINWLRDRVGRAINDSTHEI     | 868                                                      | 868  |
| TpnA4_TnpD      | 769  | TNVQTVGIPSTFQEVVTRRPLSGAQVQISIQEWEQSHRYLLANDVEIDQYAKEHKAHLKALRGKVRTEKGLLDEHNRTFINWLRDRVGRAINDSTHEI     | 868                                                      | 868  |
| Q1072_mRNA_TnpD | 769  | TNVQTVGIPSTFQEVVTRRPLSGAQVQISIQEWEQSHRYLLANDVEIDQYAKEHKAHLKALRGKVRTEKGLLDEHNRTFINWLRDRVGRAINDSTHEI     | 868                                                      | 868  |
| Tam1_TnpD       | 743  | -----TIERNKTLFLVYVNMPELHPYQIFDSIYKPNKQLTKQQLDLDLRLKGLHG                                                | 870                                                      | 870  |
| En/Spm_TnpD     | 777  | SDTNVNAQVTRYHVAEQAPITDLSAFWKDGKGVAYTSHLVG-----                                                         | 870                                                      | 870  |
| TpnA1_TnpD      | 869  | SERLKWLAHGRPNQVLKYSGLYEGVTFHTKDRDLRAVQNSCVSLVANIMQVSSAKDKNPIESDMVFYGVIDEIWELDYHTFRVVPFKMWNVENNGIK      | 968                                                      | 968  |
| TpnA2_TnpD      | 869  | SERLKWLAHGRPNQVLKYSGLYEGVTFHTKDRDLRAVQNSCVSLVANIMQVSSAKDKNPIESDMVFYGVIDEIWELDYHTFRVVPFKMWNVENNGIK      | 968                                                      | 968  |
| TpnA3_TnpD      | 869  | SERLKWLAHGRPNQVLKYSGLYEGVTFHTKDRDLRAVQNSCVSLVANIMQVSSAKDKNPIESDMVFYGVIDEIWELDYHTFRVVPFKMWNVENNGIK      | 968                                                      | 968  |
| TpnA4_TnpD      | 869  | SERLKWLAHGRPNQVLKYSGLYEGVTFHTKDRDLRAVQNSCVSLVANIMQVSSAKDKNPIESDMVFYGVIDEIWELDYHTFRVVPFKMWNVENNGIK      | 968                                                      | 968  |
| Q1072_mRNA_TnpD | 869  | SERLKWLAHGRPNQVLKYSGLYEGVTFHTKDRDLRAVQNSCVSLVANIMQVSSAKDKNPIESDMVFYGVIDEIWELDYHTFRVVPFKMWNVENNGIK      | 968                                                      | 968  |
| Tam1_TnpD       | 743  | -----PSFVQWFHEHVISLSPFFSMLSSDVT-----                                                                   | 972                                                      | 972  |
| En/Spm_TnpD     | 871  | -----PSFVQWFHEHVISLSPFFSMLSSDVT-----                                                                   | 972                                                      | 972  |
| TpnA1_TnpD      | 969  | VDDLGFKLWLDRIQFKSDSIFLGSQAKQVFIQDPQDPVWSVVLATPSRDYFQYQDGNEMDEPIIHQCFKGMPPDVVKDESEPPCIREDCDGTWVEN       | 1068                                                     | 1068 |
| TpnA2_TnpD      | 969  | VDDLGFKLWLDRIQFKSDSIFLGSQAKQVFIQDPQDPVWSVVLATPSRDYFQYQDGNEMDEPIIHQCFKGMPPDVVKDESEPPCIREDCDGTWVEN       | 1068                                                     | 1068 |
| TpnA3_TnpD      | 969  | VDDLGFKLWLDRIQFKSDSIFLGSQAKQVFIQDPQDPVWSVVLATPSRDYFQYQDGNEMDEPIIHQCFKGMPPDVVKDESEPPCIREDCDGTWVEN       | 1068                                                     | 1068 |
| TpnA4_TnpD      | 969  | VDDLGFKLWLDRIQFKSDSIFLGSQAKQVFIQDPQDPVWSVVLATPSRDYFQYQDGNEMDEPIIHQCFKGMPPDVVKDESEPPCIREDCDGTWVEN       | 1068                                                     | 1068 |
| Q1072_mRNA_TnpD | 969  | VDDLGFKLWLDRIQFKSDSIFLGSQAKQVFIQDPQDPVWSVVLATPSRDYFQYQDGNEMDEPIIHQCFKGMPPDVVKDESEPPCIREDCDGTWVEN       | 1068                                                     | 1068 |
| Tam1_TnpD       | 743  | -----                                                                                                  | 1071                                                     | 1071 |
| En/Spm_TnpD     | 898  | -----                                                                                                  | 1071                                                     | 1071 |
| TpnA1_TnpD      | 1069 | RNS                                                                                                    | 1071                                                     | 1071 |
| TpnA2_TnpD      | 1069 | RNS                                                                                                    | 1071                                                     | 1071 |
| TpnA3_TnpD      | 1069 | RNS                                                                                                    | 1071                                                     | 1071 |
| TpnA4_TnpD      | 1069 | RNS                                                                                                    | 1071                                                     | 1071 |
| Q1072_mRNA_TnpD | 1069 | RNS                                                                                                    | 1071                                                     | 1071 |
| Tam1_TnpD       | 743  | ---                                                                                                    | 742                                                      | 742  |
| En/Spm_TnpD     | 898  | ---                                                                                                    | 897                                                      | 897  |

b

|                 |     |                                                                                                     |     |
|-----------------|-----|-----------------------------------------------------------------------------------------------------|-----|
| TpnA1_TnpA      | 1   | -----MAGRRKKKIIVQEQKQGEVHGDDEHNKQEVQVDEEENMSGSQE---TQSTRSTRGRTOHMKLAMQRAQGLKQVQFNFELGGQPIG-DSA      | 84  |
| TpnA2_TnpA      | 1   | -----MAGRRKKKIIVQEQKQGEVHGDDEHNKQEVQVDEEENMSGSQE---TQSTRSTRGRTOHMKLAMQRAQGLKQVQFNFELGGQPIG-DSA      | 84  |
| Q1072_mRNA_TnpA | 1   | -----MAGRRKKKIIVQEQKQGEVHGDDEHNKQEVQVDEEENMSGSQE---TQSTRSTRGRTOHMKLAMQRAQGLKQVQFNFELGGQPIG-DSA      | 84  |
| Taml_TnpA       | 1   | MERGGKHAVEEIMPFPKTPRSKRSRREVFLHRQRETTVLQSNNSNVELYNVASEYVIENGKKRRGHTCMPKIWGQOPE-NRIVVSNFNLGQPNDEKNT  | 99  |
| TpnA1_TnpA      | 85  | AELQSYIGVLR--EKVKLNFKTWKHPQDIKDKIWDVAVNLSFRVPAIFKPKCLSSANDKWRQYKTLTNNF IWKRLNDEENLHKPPPGYINGDQWDSQF | 182 |
| TpnA2_TnpA      | 85  | AELQSYIGVLR--EKVKLNFKTWKHPQDIKDKIWDVAVNLSFRVPAIFKPKCLSSANDKWRQYKTLTNNF IWKRLNDEENLHKPPPGYINGDQWDSQF | 182 |
| Q1072_mRNA_TnpA | 85  | AELQSYIGVLR--EKVKLNFKTWKHPQDIKDKIWDVAVNLSFRVPAIFKPKCLSSANDKWRQYKTLTNNF IWKRLNDEENLHKPPPGYINGDQWDSQF | 182 |
| Taml_TnpA       | 100 | STLAHFLGTIARNGRYCPLNYKDWLMPNVYKEMMTVVKARFEIHQC--EAYVLESINKKWRWSKYLKSSKFDPSPLEQQLLEIP--ARVVKQDYKTKL  | 196 |
| TpnA1_TnpA      | 183 | VISRMSDFKKLSEQQKVRKQNLPHRLARKGYARLASEISTELCDDDEVNRAILWKKGRTSKQGEIEGDVLTFTKTKIDEYIQQKQDGLLQIQGNED    | 282 |
| TpnA2_TnpA      | 183 | VISRMSDFKKLSEQQKVRKQNLPHRLARKGYARLASEISTELCDDDEVNRAILWKKGRTSKQGEIEGDVLTFTKTKIDEYIQQKQDGLLQIQGNED    | 282 |
| Q1072_mRNA_TnpA | 183 | VISRMSDFKKLSEQQKVRKQNLPHRLARKGYARLASEISTELCDDDEVNRAILWKKGRTSKQGEIEGDVLTFTKTKIDEYIQQKQDGLLQIQGNED    | 282 |
| Taml_TnpA       | 197 | LEDWLTDETMKISEQKESRAKLLFIHRMGRSTAVQKEIVKRLG--RHPTRAEFLKCYRTDSSASAAIYEAIVRMEELAFENPPDSTNSVDPDN       | 294 |
| TpnA1_TnpA      | 283 | ILTQALESKHEGGRVRAIGGHVNPSTYFRLGKGMLDNHEKNVLLRRQATVEDRVAKLENLVLQNVAFKSSPIEEKGCTAKDAKAMKLSSEEIFGMKQK  | 382 |
| TpnA2_TnpA      | 283 | ILTQALESKHEGGRVRAIGGHVNPSTYFRLGKGMLDNHEKNVLLRRQATVEDRVAKLENLVLQNVAFKSSPIEEKGCTAKDAKAMKLSSEEIFGMKQK  | 382 |
| Q1072_mRNA_TnpA | 283 | ILTQALESKHEGGRVRAIGGHVNPSTYFRLGKGMLDNHEKNVLLRRQATVEDRVAKLENLVLQNVAFKSSPIEEKGCTAKDAKAMKLSSEEIFGMKQK  | 382 |
| Taml_TnpA       | 295 | DDFAKVMGDKYQPRLYGCVRTADIFGG-----KPSRATLLRQATVEYKEDALNAKIBELTTLHGKMHSDGQPNVVRTRGVSPVKGSTGSLPK        | 388 |
| TpnA1_TnpA      | 383 | LDGEDDDDELQFIDKEDVLEKQCKKPKSEVKKLELNSSMPKSLWLLYCYKRALGNGESLKIIVDENVFGEECTLYVHDEDPFPCQLMPSISYTCIAV   | 482 |
| TpnA2_TnpA      | 383 | LDGEDDDDELQFIDKEDVLEKQCKKPKSEVKKLELNSSMPKSLWLLYCYKRALGNGESLKIIVDENVFGEECTLYVHDEDPFPCQLMPSISYTCIAV   | 482 |
| Q1072_mRNA_TnpA | 383 | LDGEDDDDELQFIDKEDVLEKQCKKPKSEVKKLELNSSMPKSLWLLYCYKRALGNGESLKIIVDENVFGEECTLYVHDEDPFPCQLMPSISYTCIAV   | 482 |
| Taml_TnpA       | 389 | IRVG---SFVWLKNIIVAVINIVAKGVVCLNINREN-----GMDLGRGVCYLIQFIVKADADLSPHGLLQTVGDLGVVAICLWIP               | 467 |
| TpnA1_TnpA      | 483 | YIWLYKMMEDNKLEKFRFQPCHVGHVPTTRTDKNFLDKQLESRARALADRLIDNPSSASLLVPCNVGFHWILTVIN/SKDIVYLWDPDLSHRIRDDW   | 582 |
| TpnA2_TnpA      | 483 | YIWLYKMMEDNKLEKFRFQPCHVGHVPTTRTDKNFLDKQLESRARALADRLIDNPSSASLLVPCNVGFHWILTVIN/SKDIVYLWDPDLSHRIRDDW   | 582 |
| Q1072_mRNA_TnpA | 483 | YIWLYKMMEDNKLEKFRFQPCHVGHVPTTRTDKNFLDKQLESRARALADRLIDNPSSASLLVPCNVGFHWILTVIN/SKDIVYLWDPDLSHRIRDDW   | 582 |
| Taml_TnpA       | 468 | WLLNMRQNFENASLMM-----                                                                               | 484 |
| TpnA1_TnpA      | 583 | KHVVEAIAKMHVHAASGNGKGRSKTAWIVKAPRQPDNSQCGFYVMAVYKTLIENMPDIDDKDSVQALFQOVEYDKAVIDLVRSEWADILSSYIQ      | 677 |
| TpnA2_TnpA      | 583 | KHVVEAIAKMHVHAASGNGKGRSKTAWIVKAPRQPDNSQCGFYVMAVYKTLIENMPDIDDKDSVQALFQOVEYDKAVIDLVRSEWADILSSYIQ      | 677 |
| Q1072_mRNA_TnpA | 583 | KHVVEAIAKMHVHAASGNGKGRSKTAWIVKAPRQPDNSQCGFYVMAVYKTLIENMPDIDDKDSVQALFQOVEYDKAVIDLVRSEWADILSSYIQ      | 677 |
| Taml_TnpA       | 485 | -----                                                                                               | 484 |

c

|        |     |                                                                                                                |     |
|--------|-----|----------------------------------------------------------------------------------------------------------------|-----|
| TpnA1  | 175 | MGDEWSQFVISRMSDFKKLSEQQKVRKQNLPHRLARKGYARLASEISTELCDDDEVNRAILWKKGRTSKQGEI-----EGDVLTKTKTKIDEYIQQK              | 95  |
| Taml   | 189 | NKQYFKLLEDLWLTDETMKISEQKESRAKLLFIHRMGRSTAVQKEIVKRLG--RHPTRAEFLKCYRTDSSASAAIYEAIVRMEELAFEN                      | 281 |
| En/Spm | 291 | HSDAWAMNCEYWASBEFLAISNRNRNMRSLKSPGVHFGADGHVGAARMAARNG--VEPTLLQVFEVGHKGPDPNHPILLNDSNATEKLARYIDNVRKN             | 388 |
| TpnA1  | 96  | QDGLLQIQGNEDILTQALESKHEGGRVRAIGGHVNPSTYFRLGKGMLDNHEKNVLLRRQATVEDRVAKLENLVLQNVAFKSSPIEEKGCTAKDAKAMKLSSEEIFGMKQK | 307 |
| Taml   | 282 | PPDSTNSVDPNDNDFAKVMGDKYQPRLYGCVRTADIFGG-----KPSRATLLRQATVEYKEDALNAKIBELTTLHGKMHSDGQPNVVRTRGVSPVKGSTGSLPK       | 319 |
| En/Spm | 389 | GPDTDLWLTGEFDTAAYKAGGGVPHGR-LAIGDGVVPR                                                                         | 426 |

**Supplementary Figure S12. Alignment of putative transposases.** Amino acid sequences of TnpD transposases (a), TnpA transposases (b), and the conserved domain of TnpA transposases (c) from the *Tpn1* family elements, maize *En/Spm* (M25427), and snapdragon *Taml* (X57297) were aligned. Yellow boxes show polymorphic amino acids among the *Tpn1* family elements. Bars show gaps. Asterisks and dots indicate amino acids conserved among all and parts of the aligned sequences respectively. Red, blue, and green shaded regions are conserved domains of transposase family tnp2 (pfam02992), transposase-associated domain (pfam13963), and plant transposase of *Pttal/En/Spm* family (pfam03004) respectively. Sequences were aligned using ClustalW<sup>17</sup> and conserved domains were searched using NCBI's Conserved Domain Database (CDD)<sup>18</sup>.

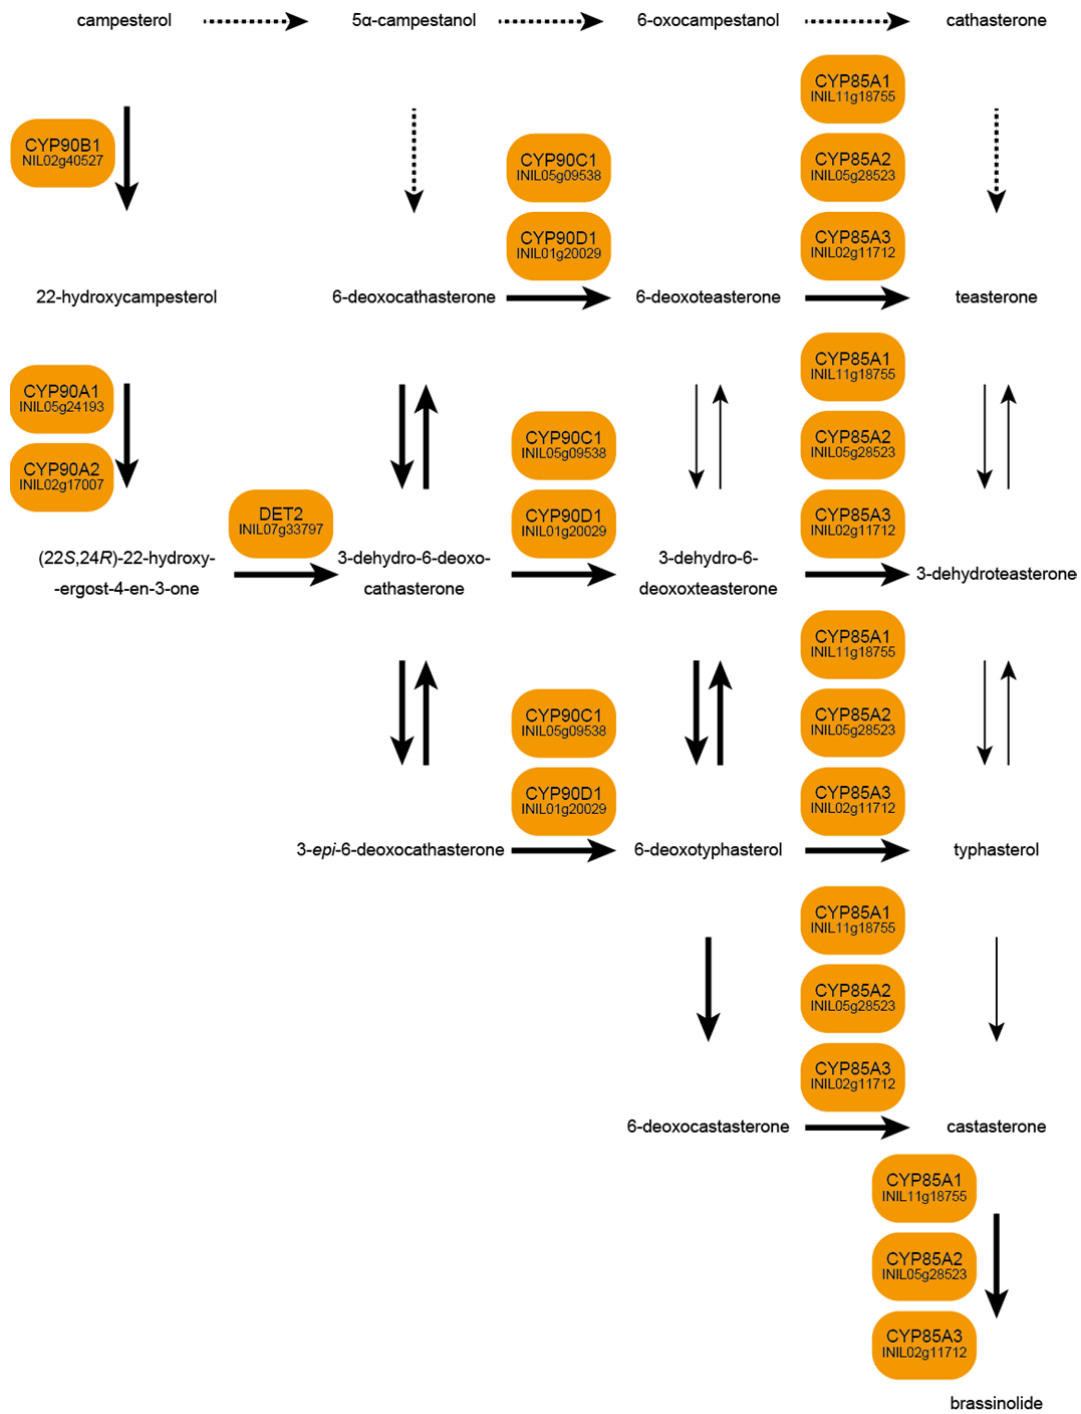

**Supplementary Figure S13. A putative brassinosteroid biosynthesis pathway in *I. nil*.** The enzyme names and *I. nil* gene IDs are represented in the colored rounded rectangles.

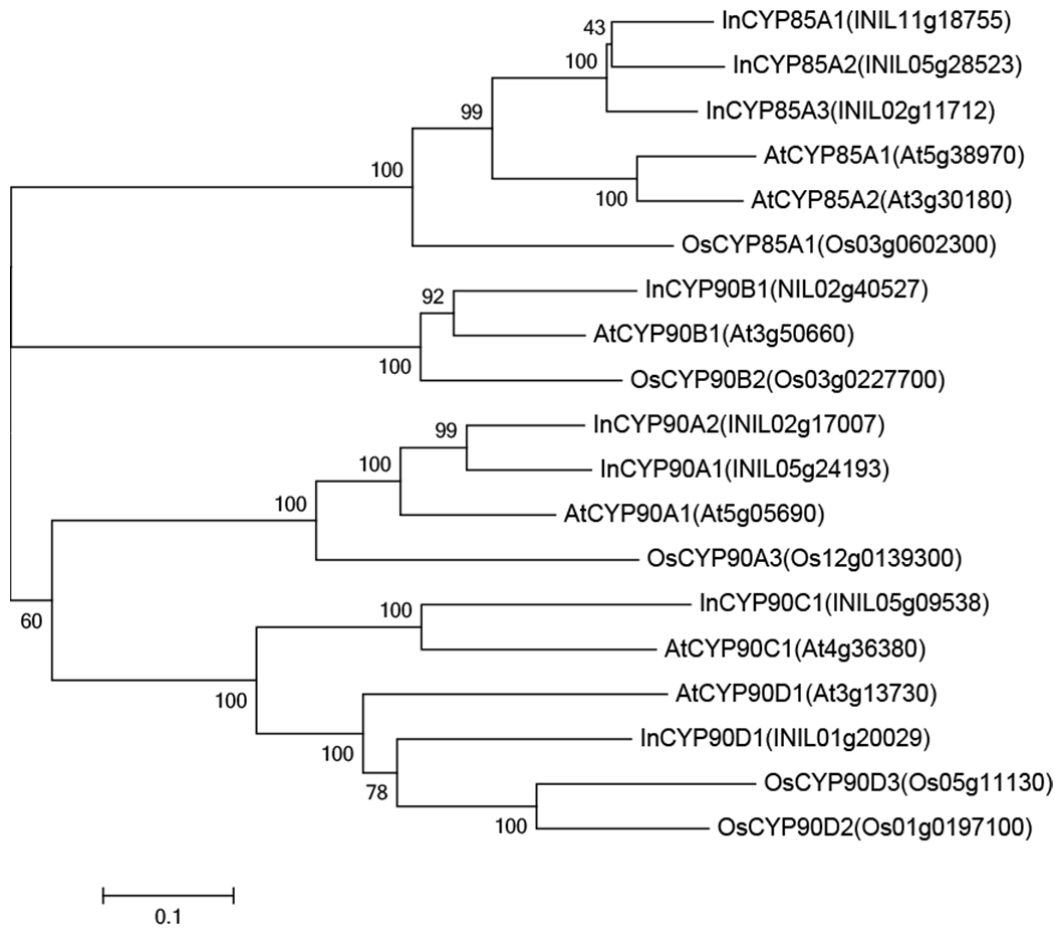

**Supplementary Figure S14. A phylogenetic tree of P450 involving BR biosynthesis in *I. nil*, Arabidopsis, and rice.** The tree was generated using the MEGA v5.2.2 program<sup>19</sup>. Amino acid sequences were aligned using ClustalW<sup>17</sup>, and the tree was constructed by the neighbor-joining method. The bootstrap values out of 1,000 replicates are indicated at each branch, and the scale shows 0.1-amino acid substitutions per site. The *I. nil* gene IDs as well as Arabidopsis and rice loci are shown in parentheses.



WT WT *ct-1* *ct-1* *ct-2* *ct-2* *ct-w* *ct-w*  
TKS violet Q594 Q848 Q851 Q853 Q220 Q787

*CT/CYP90C1*  
INIL05g09538

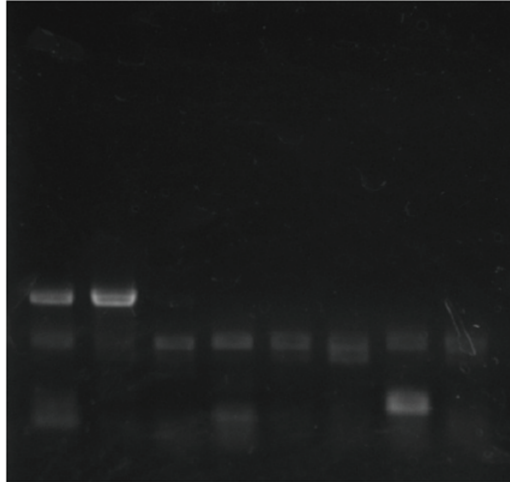

WT WT *ct-1* *ct-1* *ct-2* *ct-2* *ct-w* *ct-w*  
TKS violet Q594 Q848 Q851 Q853 Q220 Q787

*GAPDH*  
INIL08g04794

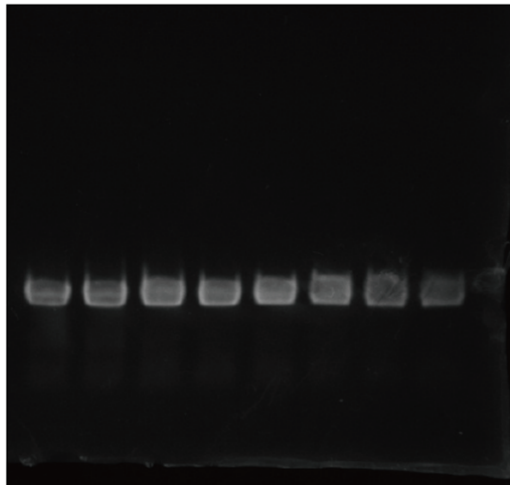

**Supplementary Figure S15. Original images of ethidium bromide agarose gels shown in Figure 3c.**

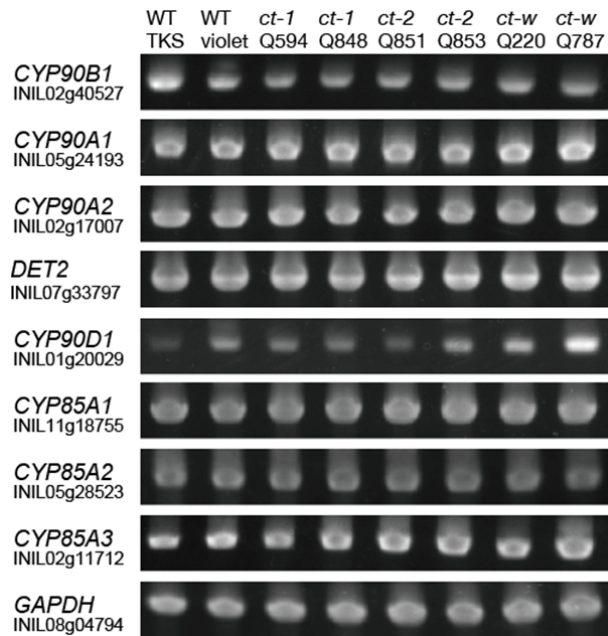

**Supplementary Figure S16. Expression of the BR synthesis gene in the hypocotyls.**

Expression was detected by reverse transcription PCR (RT-PCR). Representative gel images from three biological replicates were shown.

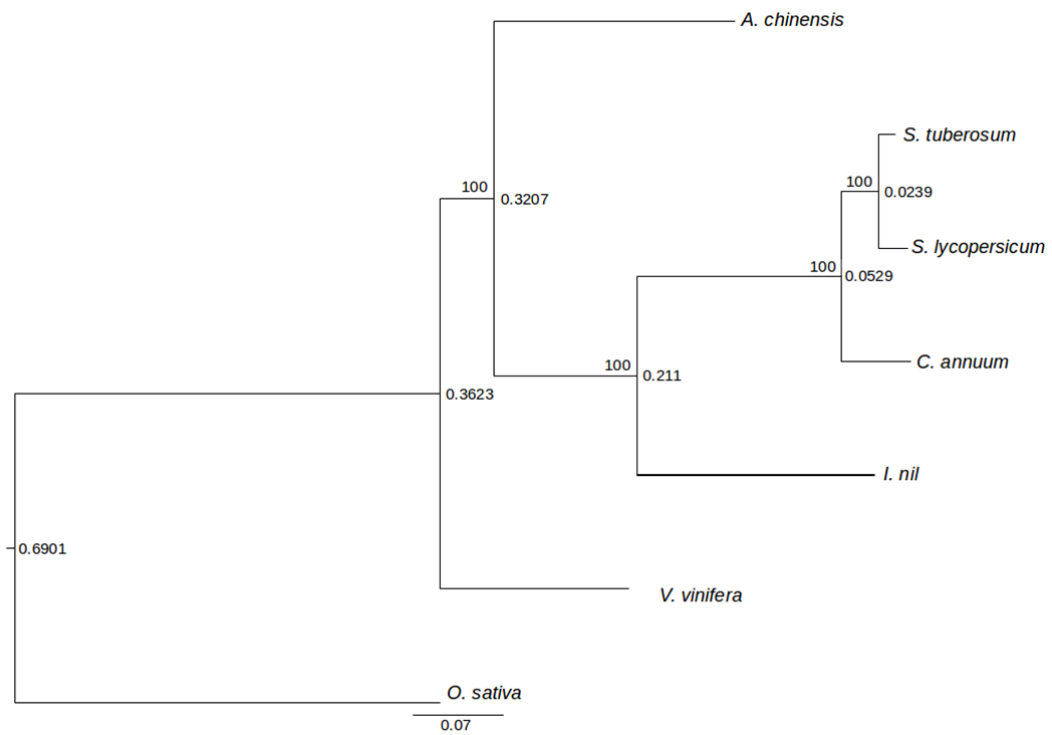

**Supplementary Figure S17. Phylogenetic tree of the seven species used for comparative analysis.** Maximum likelihood phylogenetic tree was generated using RaxML with a bootstrap value of 100. The scale bar (0.07) shows the number of substitutions per site.

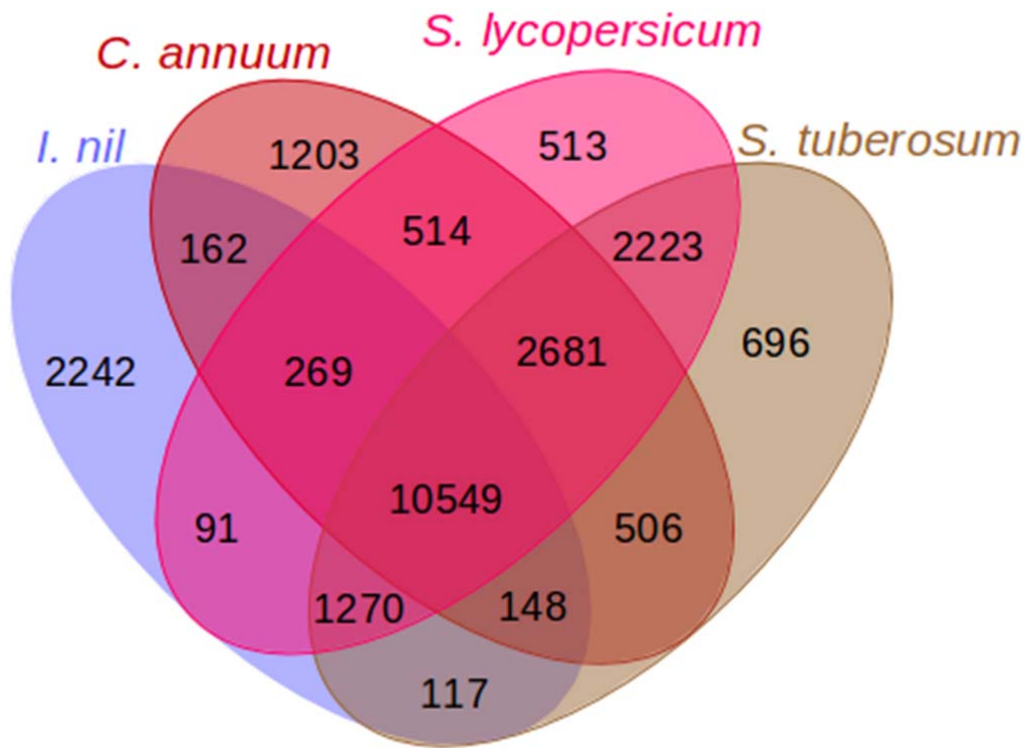

**Supplementary Figure S18. Venn diagram depicting the gene family clustering of the Solanales.**

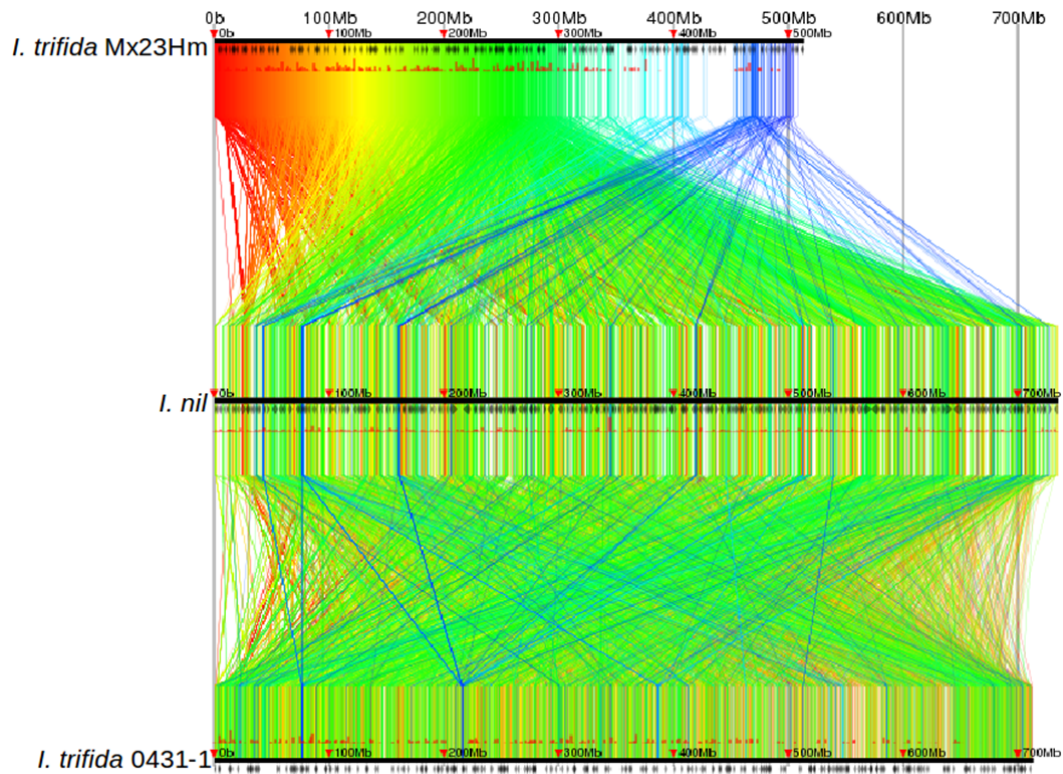

**Supplementary Figure S19. Comparative alignment of *I. nil* and *I. trifida* genomes.**

Whole genome alignments of the *I. nil* genome and the 2 lines of *I. trifida* generated using MURASAKI<sup>20</sup> with 100 bases as anchors for building the alignments.

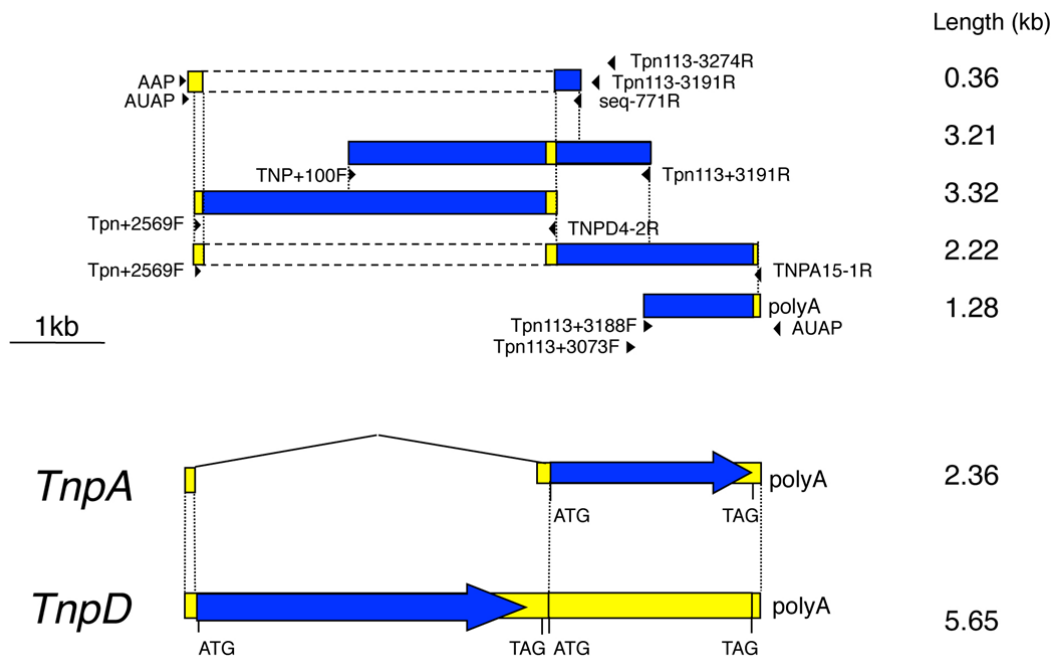

**Supplementary Figure S20. A strategy for the isolation of *TnpA* and *TnpD***

**transcripts.** Transcripts for *TnpA* and *TnpD* transposases were isolated from a mutable strain, Q1072. The yellow and blue boxes indicate untranslated regions and coding sequences respectively. The directions of the arrows show the orientations of the transposases. pA, ATG, and TAG indicate poly-adenines, start and stop codons respectively. Primer sequences are described in Supplementary Table S20.

## Supplementary Tables

**Supplementary Table S1.** Statistics of raw Illumina reads

| Strategy   | Insert length | # of reads (in millions) | # of bases (in Gb) | Sequence coverage | Accession number        |
|------------|---------------|--------------------------|--------------------|-------------------|-------------------------|
| Paired end | 300 bp        | 602                      | 90                 | 123 ×             | DRR013917,<br>DRR013918 |
| Paired end | 500 bp        | 652                      | 98                 | 133 ×             | DRR013919,<br>DRR013920 |
| Mate pair  | 3 kb          | 563                      | 85                 | 115 ×             | DRR013921,<br>DRR013922 |
| Mate pair  | 5 kb          | 544                      | 82                 | 111 ×             | DRR013923,<br>DRR013924 |
| Mate pair  | 10 kb         | 584                      | 88                 | 119 ×             | DRR013925,<br>DRR013926 |
| Mate pair  | 10 kb         | 505                      | 76                 | 103 ×             | DRR048755               |
| Mate pair  | 15 kb         | 495                      | 74                 | 101 ×             | DRR048756               |
| Mate pair  | 20 kb         | 494                      | 74                 | 101 ×             | DRR048757               |

**Supplementary Table S2.** Comparison of the stepwise assemblies of PacBio data, with each step referring to the step from the assembly workflow (Supplementary Fig. S3)

|                           | Step 1      | Step 2      | Step 3      | Step 4      | Step 5      | Step 6      | Step 7      |
|---------------------------|-------------|-------------|-------------|-------------|-------------|-------------|-------------|
| <b>Scaffolds</b>          |             |             |             |             |             |             |             |
| Sequences                 |             |             | 3,367       | 3,495       | 3,345       | 3,345       | 3,416       |
| Total Length of Sequences |             |             | 734,061,355 | 734,055,648 | 735,418,791 | 734,768,050 | 734,803,190 |
| Gap openings              |             |             | 624         | 602         | 544         | 461         | 449         |
| Gap length                |             |             | 327,148     | 321,441     | 177,095     | 177,012     | 211,647     |
| Longest sequence length   |             |             | 16,099,154  | 14,441,919  | 14,449,637  | 14,449,637  | 14,449,934  |
| Shortest sequence length  |             |             | 638         | 638         | 638         | 638         | 638         |
| Average sequence length   |             |             | 218,016.44  | 210,030.23  | 219,856.14  | 219,661.60  | 215,106.32  |
| N50                       |             | NA          | 4,082,476   | 2,890,004   | 3,727,853   | 3,727,853   | 2,880,368   |
| Sequences (>10 Mb)        |             |             | 7           | 2           | 6           | 6           | 2           |
| Sequences (>1 Mb)         |             |             | 166         | 204         | 182         | 182         | 205         |
| Sequences (>100 kb)       |             |             | 299         | 401         | 326         | 326         | 389         |
| Sequences (>10 kb)        |             |             | 2,043       | 2,164       | 2,120       | 2,120       | 2,194       |
| Sequences (>1 kb)         |             |             | 3,349       | 3,473       | 3,329       | 3,329       | 3,404       |
| Sequences (>500 bp)       |             |             | 3,367       | 3,491       | 3,341       | 3,341       | 3,416       |
| Sequences (>100 bp)       |             |             | 3,367       | 3,491       | 3,341       | 3,341       | 3,416       |
| <b>Contigs</b>            |             |             |             |             |             |             |             |
| Sequences                 | 4,187       | 3,991       | 3,991       | 4,097       | 3,889       | 3,806       | 3,865       |
| Total Length of Sequences | 736,457,052 | 733,734,371 | 733,734,207 | 733,734,207 | 735,241,696 | 734,591,038 | 734,591,543 |
| Longest sequence length   | 11,504,781  | 11,504,932  | 11,504,932  | 8,729,492   | 11,281,532  | 11,281,532  | 9,127,415   |
| Shortest sequence length  | 638         | 638         | 638         | 638         | 638         | 638         | 638         |
| Average sequence length   | 175,891.34  | 183,847.25  | 183,847.21  | 179,090.60  | 189,056.75  | 193,008.68  | 190,062.49  |
| N50                       | 1,830,236   | 1,825,684   | 1,825,684   | 1,584,472   | 1,918,312   | 2,087,487   | 1,873,359   |
| Sequences (>10 Mb)        | 4           | 4           | 4           | 0           | 3           | 3           | 0           |
| Sequences (>1 Mb)         | 191         | 191         | 191         | 200         | 189         | 195         | 205         |
| Sequences (>100 kb)       | 649         | 649         | 649         | 724         | 620         | 574         | 625         |
| Sequences (>10 kb)        | 2,773       | 2,648       | 2,648       | 2,746       | 2,650       | 2,567       | 2,629       |
| Sequences (>1 kb)         | 4,169       | 3,973       | 3,973       | 4,075       | 3,873       | 3,790       | 3,853       |
| Sequences (>500 bp)       | 4,187       | 3,991       | 3,991       | 4,093       | 3,885       | 3,802       | 3,865       |
| Sequences (>100 bp)       | 4,187       | 3,991       | 3,991       | 4,093       | 3,885       | 3,802       | 3,865       |



**Supplementary Table S3.** Comparison of the Illumina and PacBio assemblies

|                           | <b>PacBio<br/>Assembly</b> | <b>Illumina<br/>Assembly</b> |
|---------------------------|----------------------------|------------------------------|
| Sequences                 | 3,416                      | 2,262,957                    |
| Total length of sequences | 734,803,190                | 1,106,449,450                |
| Gap openings              | 449                        | 132,545                      |
| Gap lengths               | 211,647                    | 74,798,170                   |
| Longest sequence length   | 14,449,934                 | 18,182,283                   |
| Shortest sequence length  | 638                        | 128                          |
| Average sequence length   | 215,106.32                 | 488.94                       |
| N50 (sequences >1 kb)     | 2,880,368                  | 3,532,667                    |
| Sequences (>10 Mb)        | 2                          | 3                            |
| Sequences (>1 Mb)         | 205                        | 213                          |
| Sequences (>100 kb)       | 389                        | 387                          |
| Sequences (>1 kb)         | 3,404                      | 3,927                        |
| Sequences (>100 b)        | 3,416                      | 2,262,957                    |

Mis-assemblies were not resolved in the Illumina based assembly.

**Supplementary Table S4.** CEGMA analysis results

|          | <b>#Proteins</b> | <b>%Completeness</b> | <b>#Total</b> | <b>Average</b> | <b>%Ortho</b> |
|----------|------------------|----------------------|---------------|----------------|---------------|
| Complete | 234              | 94.35                | 454           | 1.94           | 55.13         |
| Group 1  | 62               | 93.94                | 100           | 1.61           | 41.94         |
| Group 2  | 52               | 92.86                | 84            | 1.62           | 36.54         |
| Group 3  | 57               | 93.44                | 126           | 2.21           | 64.91         |
| Group 4  | 63               | 96.92                | 144           | 2.29           | 74.6          |
| Partial  | 247              | 99.6                 | 539           | 2.18           | 61.13         |
| Group 1  | 66               | 100                  | 116           | 1.76           | 45.45         |
| Group 2  | 56               | 100                  | 104           | 1.84           | 48.21         |
| Group 3  | 61               | 100                  | 151           | 2.48           | 68.85         |
| Group 4  | 64               | 98.46                | 168           | 2.64           | 81.25         |

# Proteins = number of 248 ultra-conserved CEGs present in genome

% Completeness = percentage of 248 ultra-conserved CEGs present

# Total = total number of CEGs present including putative orthologs

Average = average number of orthologs per CEG

% Ortho = percentage of detected CEGs that have more than 1 ortholog

**Supplementary Table S5. BUSCO analysis results**

---

|                             |            |
|-----------------------------|------------|
| Complete Single-Copy BUSCOs | 911 (95 %) |
| Complete Duplicated BUSCOs  | 186 (19 %) |
| Fragmented BUSCOs           | 16 (1.6 %) |
| Missing BUSCOs              | 29 (3 %)   |
| Total BUSCO groups searched | 956        |

---

**Supplementary Table S6.** Alignment statistics of RNAseq data

| <b>Sample</b> | <b>Total reads</b> | <b>Paired mapping rate</b> | <b>Concordant mapping rate</b> |
|---------------|--------------------|----------------------------|--------------------------------|
| Leaf          | 10,555,280         | 96.66%                     | 94.10%                         |
| Embryo        | 13,217,158         | 94.75%                     | 96.90%                         |
| Flower        | 11,692,810         | 96.46%                     | 94.00%                         |
| Stem          | 11,493,650         | 96.38%                     | 93.00%                         |
| Root          | 11,601,760         | 96.36%                     | 93.20%                         |
| Seed coat     | 11,111,334         | 96.73%                     | 89.10%                         |

**Supplementary Table S7.** Validation using entire BAC clone sequences

| <b>Statistics</b> | <b>1</b>     | <b>2</b>     | <b>3</b>     | <b>4</b>     | <b>5</b>     |
|-------------------|--------------|--------------|--------------|--------------|--------------|
| <b>BLATScore</b>  | 94,487       | 100,460      | 126,029      | 106,895      | 125,057      |
| <b>Mismatches</b> | 0            | 0            | 0            | 0            | 1            |
| <b>QgapOpen</b>   | 2            | 5            | 2            | 10           | 0            |
| <b>QgapBases</b>  | 2            | 11           | 2            | 381          | 0            |
| <b>TgapOpen</b>   | 7            | 6            | 6            | 5            | 2            |
| <b>TgapBases</b>  | 15           | 8            | 9            | 8            | 8            |
| <b>Strand</b>     | +            | -            | +            | -            | -            |
| <b>Q</b>          | JMHiBa001106 | JMHiBa001L04 | JMHiBa010C11 | JMHiBa037J13 | JMHiBa038C09 |
| <b>Q Length</b>   | 94,489       | 100,471      | 126,031      | 107,276      | 125,058      |
| <b>Q Start</b>    | 1            | 1            | 1            | 1            | 1            |
| <b>Q End</b>      | 94,489       | 100,471      | 126,031      | 107,276      | 125,058      |
| <b>T</b>          | BDFN01001932 | BDFN01002922 | BDFN01003321 | BDFN01001622 | BDFN01000202 |
| <b>T Length</b>   | 4,383,442    | 1,727,344    | 7,168,875    | 720,308      | 2,880,368    |
| <b>T Start</b>    | 3,161,503    | 1,506,449    | 636,499      | 101,555      | 75,108       |
| <b>T End</b>      | 3,256,005    | 1,606,917    | 762,537      | 208,458      | 200,174      |

Q and T indicates query and target sequences respectively.

**Supplementary Table S8.** Telomere repeat statistics

| <b>Scaffold</b> | <b>Start</b> | <b>End</b> | <b>Length</b> | <b>Orientation</b> | <b># Repeating units</b> | <b>Pseudo-chromosomes</b> |
|-----------------|--------------|------------|---------------|--------------------|--------------------------|---------------------------|
| BDFN01001407    | 6,507,520    | 6,510,126  | 2,607         | 3'                 | 379.3                    | 2                         |
| BDFN01001026    | 1            | 1,414      | 1,414         | 5'                 | 203.3                    | 2                         |
| BDFN01003340    | 373,876      | 377,001    | 3,126         | 3'                 | 447.6                    | 3                         |
| BDFN01002922    | 15           | 5,582      | 5,568         | 5'                 | 797.9                    | 4                         |
| BDFN01001719    | 538,273      | 539,293    | 1,021         | 5'                 | 145.1                    | 5                         |
| BDFN01003069    | 10,854,526   | 10,854,850 | 325           | 5'                 | 47.1                     | 6                         |
| BDFN01001622    | 1            | 2,780      | 2,780         | 3'                 | 396                      | 6                         |
| BDFN01003087    | 4,002,600    | 4,007,449  | 4,850         | 3'                 | 707.4                    | 8                         |
| BDFN01003267    | 1            | 3,440      | 3,440         | 5'                 | 493                      | 8                         |
| BDFN01002704    | 1            | 1,760      | 1,760         | 5'                 | 254.6                    | 9                         |
| BDFN01001043    | 1            | 5,813      | 5,813         | 5'                 | 825.9                    | 10                        |
| BDFN01000302    | 1            | 7,517      | 7,517         | 3'                 | 1,085.4                  | 12                        |
| BDFN01000688    | 8,724,735    | 8,729,492  | 4,758         | 5'                 | 678                      | 13                        |
| BDFN01000317    | 1            | 2,185      | 2,185         | 5'                 | 314.7                    | 14                        |
| BDFN01003321    | 1            | 1,885      | 1,885         | 3'                 | 270                      | 14                        |
| BDFN01002480    | 3            | 3,164      | 3,162         | 5'                 | 454.9                    | 15                        |
| BDFN01000242    | 1            | 8,918      | 8,918         | -                  | 1,260.3                  | -                         |
| BDFN01000287    | 1            | 1,736      | 1,736         | -                  | 248.9                    | -                         |
| BDFN01000409    | 4            | 2,254      | 2,251         | -                  | 335.6                    | -                         |
| BDFN01000413    | 1            | 3,520      | 3,520         | -                  | 504.4                    | -                         |
| BDFN01000448    | 1            | 11,350     | 11,350        | -                  | 1,597.9                  | -                         |
| BDFN01000658    | 3            | 4,407      | 4,405         | -                  | 633.1                    | -                         |
| BDFN01001077    | 3            | 6,554      | 6,552         | -                  | 937.1                    | -                         |
| BDFN01001434    | 1            | 2,617      | 2,617         | -                  | 376.4                    | -                         |
| BDFN01001461    | 1            | 7,302      | 7,302         | -                  | 1,053.6                  | -                         |
| BDFN01001704    | 1            | 32,455     | 32,455        | -                  | 4,613.9                  | -                         |
| BDFN01001887    | 1            | 4,704      | 4,704         | -                  | 679.9                    | -                         |
| BDFN01002452    | 1            | 3,490      | 3,490         | -                  | 493.7                    | -                         |
| BDFN01003094    | 3            | 7,951      | 7,949         | -                  | 1,148.3                  | -                         |
| BDFN01002227    | 14,878       | 16,227     | 1,350         | -                  | 199.3                    | -                         |

**Supplementary Table S9.** rDNA statistics

| <b>Scaffold</b> | <b>Type</b> | <b>#<br/>Units</b> |
|-----------------|-------------|--------------------|
| BDFN01000878    | 5S rDNA     | 10                 |
| BDFN01001902    | 5S rDNA     | 17                 |
| BDFN01001350    | 5S rDNA     | 26                 |
| BDFN01002927    | 5S rDNA     | 28                 |
| BDFN01001762    | 5S rDNA     | 31                 |
| BDFN01002297    | 5S rDNA     | 36                 |
| BDFN01000751    | 5S rDNA     | 39                 |
| BDFN01001488    | 5S rDNA     | 46                 |
| BDFN01001624    | 5S rDNA     | 46                 |
| BDFN01002378    | 5S rDNA     | 52                 |
| BDFN01002742    | 5S rDNA     | 56                 |
| BDFN01003242    | 5S rDNA     | 61                 |
| BDFN01003244    | 5S rDNA     | 62                 |
| BDFN01000391    | 5S rDNA     | 67                 |
| BDFN01003186    | 5S rDNA     | 69                 |
| BDFN01001947    | 5S rDNA     | 73                 |
| BDFN01003379    | 5S rDNA     | 73                 |
| BDFN01001885    | 5S rDNA     | 76                 |
| BDFN01002400    | 5S rDNA     | 82                 |
| BDFN01003084    | 5S rDNA     | 88                 |
| BDFN01002263    | 5S rDNA     | 174                |
| BDFN01000032    | NOR         | 2                  |
| BDFN01000065    | NOR         | 2                  |
| BDFN01000140    | NOR         | 2                  |
| BDFN01000149    | NOR         | 2                  |
| BDFN01000194    | NOR         | 2                  |
| BDFN01000206    | NOR         | 2                  |
| BDFN01000396    | NOR         | 2                  |
| BDFN01000476    | NOR         | 2                  |
| BDFN01000477    | NOR         | 2                  |
| BDFN01000486    | NOR         | 2                  |
| BDFN01000636    | NOR         | 2                  |
| BDFN01000693    | NOR         | 2                  |
| BDFN01000770    | NOR         | 2                  |
| BDFN01000983    | NOR         | 2                  |
| BDFN01001025    | NOR         | 2                  |
| BDFN01001076    | NOR         | 2                  |
| BDFN01001398    | NOR         | 2                  |
| BDFN01001459    | NOR         | 2                  |
| BDFN01001531    | NOR         | 2                  |
| BDFN01001545    | NOR         | 2                  |
| BDFN01001609    | NOR         | 2                  |
| BDFN01001675    | NOR         | 2                  |
| BDFN01001766    | NOR         | 2                  |
| BDFN01001889    | NOR         | 2                  |
| BDFN01002029    | NOR         | 2                  |
| BDFN01002172    | NOR         | 2                  |

|                     |            |          |
|---------------------|------------|----------|
| BDFN01002178        | NOR        | 2        |
| BDFN01002597        | NOR        | 2        |
| BDFN01002934        | NOR        | 2        |
| BDFN01003076        | NOR        | 2        |
| BDFN01003229        | NOR        | 2        |
| BDFN01003233        | NOR        | 2        |
| BDFN01003259        | NOR        | 2        |
| BDFN01003310        | NOR        | 2        |
| BDFN01001688        | NOR        | 3        |
| BDFN01002002        | NOR        | 3        |
| <u>BDFN01002009</u> | <u>NOR</u> | <u>3</u> |



**Supplementary Table S10.** Putative centromeric repeat statistics

| <b>Scaffold</b> | <b>ScaffoldStart</b> | <b>ScaffoldEnd</b> | <b>Chr</b> | <b>ChrStart</b> | <b>ChrEnd</b> | <b>Length</b> |
|-----------------|----------------------|--------------------|------------|-----------------|---------------|---------------|
| BDFN01002165    | 2,909,054            | 2,970,073          | 1          | 12,053,754      | 12,114,773    | 61,020        |
| BDFN01002191    | 60,623               | 67,982             | 2          | 28,397,071      | 28,404,430    | 7,360         |
| BDFN01000794    | 254,934              | 432,528            | 3          | 7,168,727       | 7,346,321     | 177,595       |
| BDFN01000222    | 102,194              | 178,324            | 5          | 29,541,552      | 29,617,682    | 76,131        |
| BDFN01001993    | 3,770,803            | 3,782,015          | 6          | 35,924,044      | 35,935,256    | 11,213        |
| BDFN01002928    | 2,752,998            | 2,758,913          | 8          | 30,246,790      | 30,252,705    | 5,916         |
| BDFN01003226    | 682,231              | 750,649            | 9          | 23,220,192      | 23,288,610    | 68,419        |
| BDFN01003314    | 6,904,122            | 6,914,607          | 10         | 26,085,935      | 26,096,420    | 10,486        |
| BDFN01002752    | 73,285               | 106,516            | 12         | 23,848,936      | 23,882,167    | 33,232        |
| BDFN01003104    | 1,904,565            | 1,910,793          | 13         | 33,938,054      | 33,944,282    | 6,229         |
| BDFN01002694    | 1,373,703            | 1,477,297          | 14         | 22,742,219      | 22,845,813    | 103,595       |
| BDFN01000233    | 1                    | 28,566             | 15         | 16,639,357      | 16,667,922    | 28,566        |

Chr represents pseudo-chromosomes.

**Supplementary Table S11.** Repeat statistics

| <b>Repeat Element</b>       | <b># Elements</b> | <b>Length</b>  | <b>% of sequence</b> |
|-----------------------------|-------------------|----------------|----------------------|
| SINEs:                      | 19,969            | 2,353,092 bp   | 0.32 %               |
| LINEs:                      | 34,813            | 26,762,658 bp  | 3.64 %               |
| LINE1                       | 19,519            | 18,890,912 bp  | 2.57 %               |
| LINE2                       | 1,639             | 283,754 bp     | 0.04 %               |
| LTR elements:               | 162,828           | 159,326,417 bp | 21.68 %              |
| ERV_classI                  | 390               | 288,209 bp     | 0.04 %               |
| ERV_classII                 | 344               | 78,469 bp      | 0.01 %               |
| DNA elements:               | 157,639           | 41,114,566 bp  | 5.60 %               |
| Unclassified:               | 638,987           | 164,554,486 bp | 26.82 %              |
| Total interspersed repeats: |                   | 426,666,146 bp | 58.07 %              |
| Small RNA:                  | 14,163            | 18,956,859 bp  | 2.58 %               |
| Satellites:                 | 2,052             | 1,479,996 bp   | 0.20 %               |
| Simple repeats:             | 334,984           | 19,883,956 bp  | 2.71 %               |
| Low complexity:             | 31,512            | 1,652,290 bp   | 0.22 %               |
| Total Repeats               |                   | 465,044,229 bp | 63.29 %              |

**Supplementary Table S12.** The proportion of LTR copia and LTR gypsy repeat elements in the 15 pseudo-chromosomes

| Pseudo-chromosome | Copia             |              | Gypsy              |              |
|-------------------|-------------------|--------------|--------------------|--------------|
|                   | Length            | Percentage   | Length             | Percentage   |
| 1                 | 5,801,120         | 13.53        | 6,890,412          | 16.07        |
| 2                 | 4,958,985         | 11.51        | 5,992,448          | 13.91        |
| 3                 | 4,994,172         | 12.87        | 5,895,457          | 15.19        |
| 4                 | 6,777,445         | 13.67        | 7,408,401          | 14.94        |
| 5                 | 5,042,172         | 11.90        | 6,205,709          | 14.64        |
| 6                 | 6,527,109         | 13.26        | 7,944,017          | 16.14        |
| 7                 | 3,395,198         | 10.74        | 4,220,562          | 13.35        |
| 8                 | 5,313,761         | 12.79        | 6,001,260          | 14.44        |
| 9                 | 6,326,179         | 14.95        | 6,679,331          | 15.78        |
| 10                | 5,912,286         | 13.40        | 6,219,745          | 14.10        |
| 11                | 4,695,077         | 12.01        | 5,094,635          | 13.03        |
| 12                | 9,057,553         | 13.68        | 9,449,217          | 14.27        |
| 13                | 7,190,683         | 14.73        | 7,329,827          | 15.01        |
| 14                | 7,522,699         | 12.54        | 8,105,536          | 13.52        |
| 15                | 4,188,809         | 13.07        | 4,975,673          | 15.52        |
| Unassigned        | 7,197,387         | 11.41        | 7,866,454          | 12.47        |
| <b>Total</b>      | <b>94,900,635</b> | <b>12.92</b> | <b>106,278,684</b> | <b>14.46</b> |

**Supplementary Table S13.** List of 3-bp TSDs in predicted *Tpn1* transposons

| <b>TSD</b> | <b># Copies</b> | <b>TSD</b> | <b># Copies</b> |
|------------|-----------------|------------|-----------------|
| TTA        | 22              | ATC        | 4               |
| AAT        | 20              | ATG        | 4               |
| ATT        | 17              | CGC        | 4               |
| AAA        | 15              | GCA        | 4               |
| TTT        | 14              | GGG        | 4               |
| ATA        | 13              | GTA        | 4               |
| TAT        | 11              | TGC        | 4               |
| AGT        | 10              | CTG        | 3               |
| GTT        | 9               | GAA        | 3               |
| CAC        | 8               | GCC        | 3               |
| CAT        | 8               | GCT        | 3               |
| TGA        | 8               | GTG        | 3               |
| AAG        | 7               | TAG        | 3               |
| ACA        | 7               | TGG        | 3               |
| ACT        | 7               | CCC        | 2               |
| CTT        | 7               | CGA        | 2               |
| TAA        | 7               | CGT        | 2               |
| TTC        | 7               | GAC        | 2               |
| AGA        | 6               | GGA        | 2               |
| CTC        | 6               | TCT        | 2               |
| TCA        | 6               | ACC        | 1               |
| TGT        | 6               | CCA        | 1               |
| AAC        | 5               | CCG        | 1               |
| CAA        | 5               | GAG        | 1               |
| CTA        | 5               | GGC        | 1               |
| GAT        | 5               | GGT        | 1               |
| TAC        | 5               | GTC        | 1               |
| AGC        | 4               | TCC        | 1               |
| AGG        | 4               | TTG        | 1               |

**Supplementary Table S14.** List of the *TpnI* transposons inserted in the predicted genes

| Scaffold     | TpnStart | TpnEnd  | Gene ID      | Location of Tpn in the gene | Best hit to the predicted genes |                                                                         |           |
|--------------|----------|---------|--------------|-----------------------------|---------------------------------|-------------------------------------------------------------------------|-----------|
|              |          |         |              |                             | Accession Number                | Description                                                             | E Value   |
| BDFN01000146 | 4167271  | 4171345 | INIL07g00616 | Within 5' UTR               | XP_010451516                    | PREDICTED: uncharacterized protein LOC104733649                         | 0.098     |
| BDFN01000317 | 1396039  | 1396973 | INIL14g03735 | Within Intron               | EYU25856                        | hypothetical protein MIMGU_mgv1a004842mg                                | 2.00E-113 |
| BDFN01000382 | 2241510  | 2248682 | INIL08g04773 | Within Intron               | XP_015076614                    | PREDICTED: protein SIEVE ELEMENT OCCLUSION B-like                       | 0         |
| BDFN01000684 | 564240   | 571930  | INIL12g07315 | Within Intron               | XP_016460392                    | PREDICTED: apyrase-like                                                 | 0         |
| BDFN01000761 | 1642180  | 1645470 | INIL11g08821 | Start of 5' UTR             | XP_012075563                    | PREDICTED: uncharacterized protein LOC105636820                         | 3.00E-09  |
| BDFN01000813 | 998831   | 1003004 | INIL11g09944 | Within Intron               | XP_009763476                    | PREDICTED: NEP1-interacting protein-like 1                              | 2.00E-110 |
| BDFN01000900 | 89223    | 95490   | INIL11g10743 | Within Intron               | XP_002280746                    | PREDICTED: two-component response regulator ARR17 isoform X1            | 4.00E-24  |
| BDFN01001026 | 581352   | 587956  | INIL02g11577 | Within Intron               | XP_015879219                    | PREDICTED: metalloendoproteinase 3-MMP-like                             | 7.00E-75  |
| BDFN01001074 | 3432916  | 3439614 | INIL08g13816 | Within Intron               | KOM31814                        | hypothetical protein LR48_Vigan01g137000                                | 0.019     |
| BDFN01001149 | 2211938  | 2227500 | INIL06g14602 | Within Intron               | YP_007476106                    | hypothetical chloroplast RF19                                           | 0.034     |
| BDFN01001179 | 2105495  | 2112352 | INIL12g14752 | Within Intron               | KZV56143                        | hypothetical protein F511_28809                                         | 4.00E-12  |
| BDFN01001310 | 1663686  | 1667705 | INIL06g16228 | Within Intron               | KZM95221                        | hypothetical protein DCAR_018463                                        | 3.00E-05  |
| BDFN01001566 | 175717   | 188666  | INIL00g19501 | Start of 5' UTR             | OAE18503                        | hypothetical protein AXG93_163s1360                                     | 0.14      |
| BDFN01001612 | 286033   | 292485  | INIL04g20363 | Within Intron               | KYP49349                        | Retrovirus-related Pol polyprotein from transposon 17.6                 | 2.00E-38  |
| BDFN01001735 | 7087     | 13506   | INIL14g21144 | Within Intron               | BAF64710                        | putative transposase                                                    | 2.00E-54  |
| BDFN01001834 | 5102907  | 5109996 | INIL12g22234 | Within Intron               | XP_010262527                    | PREDICTED: oxysterol-binding protein-related protein 3A-like isoform X2 | 2.00E-80  |
| BDFN01001940 | 1164961  | 1172051 | INIL12g23290 | Within Intron               | XP_016562472                    | PREDICTED: exocyst complex component EXO70A1-like                       | 2.00E-07  |
| BDFN01002387 | 1026555  | 1030496 | INIL13g27102 | Within Intron               | XP_012464232                    | PREDICTED: carboxypeptidase Y                                           | 7.00E-41  |
| BDFN01002403 | 1403792  | 1411332 | INIL08g27285 | Within Intron               | XP_016494310                    | PREDICTED: topless-related protein 3-like isoform X2                    | 6.00E-128 |
| BDFN01002422 | 566388   | 569002  | INIL15g27411 | Within 5' UTR               | XP_016436617                    | PREDICTED: uncharacterized protein LOC107762748 isoform X1              | 7.00E-53  |
| BDFN01002494 | 182596   | 188978  | INIL14g28304 | Within Intron               | XP_009108869                    | PREDICTED: transcriptional corepressor LEUNIG                           | 1.5       |
| BDFN01002653 | 2117625  | 2124193 | INIL15g29342 | Within 5' UTR               | XP_015960841                    | PREDICTED: uncharacterized protein LOC107484813                         | 0.022     |
| BDFN01002653 | 2207114  | 2222242 | INIL15g29346 | Within 5' UTR               | XP_013452680                    | hypothetical protein MTR_6g471360                                       | 5.00E-04  |
| BDFN01002847 | 414256   | 421345  | INIL00g33995 | Within Intron               | EEF41191                        | conserved hypothetical protein                                          | 7.00E-22  |
| BDFN01002957 | 552638   | 559727  | INIL09g35808 | Within Intron               | XP_009591617                    | PREDICTED: TMV resistance protein N-like                                | 1.00E-73  |
| BDFN01003047 | 597586   | 604379  | INIL04g36913 | Within Intron               | XP_015056343                    | PREDICTED: vicianin hydrolase-like                                      | 0         |
| BDFN01003170 | 2450756  | 2457359 | INIL12g40104 | Within Intron               | CDP00659                        | unnamed protein product                                                 | 4.00E-175 |
| BDFN01003265 | 81415    | 86451   | INIL03g41086 | Within Intron               | XP_016564068                    | PREDICTED: uncharacterized protein LOC107862882                         | 1.00E-161 |
| BDFN01003321 | 5576870  | 5584444 | INIL14g41885 | Within Intron               | XP_015168855                    | PREDICTED: uncharacterized protein LOC102579241                         | 2.00E-33  |

**Supplementary Table S15.** Statistics of the predicted gene models

|                               |                 |
|-------------------------------|-----------------|
| Genes                         | 42,783          |
| Transcripts with complete ORF | 44,916          |
| Transcripts with 1 exon       | 7,868 (17.52 %) |
| Transcripts with 2 exons      | 7,624 (16.98 %) |
| Transcripts with 3 exons      | 6,220 (13.84 %) |
| Transcripts with 4 exons      | 4,750 (10.58 %) |
| Transcripts with 5 exons      | 3,748 (8.34 %)  |
| Transcripts with 6 exons      | 2,821 (6.28 %)  |
| Transcripts with 7 exons      | 2,281 (5.07 %)  |
| Transcripts with 8 exons      | 1,752 (3.90 %)  |
| Transcripts with 9 exons      | 1,527 (3.39 %)  |
| Transcripts with 10 exons     | 1,177 (2.62 %)  |
| Transcripts with 11 exons     | 957 (2.13 %)    |
| Transcripts with 12 exons     | 705 (1.56 %)    |
| Transcripts with 13 exons     | 670 (1.49 %)    |
| Transcripts with 14 exons     | 540 (1.20 %)    |
| Transcripts with 15 exons     | 412 (0.91 %)    |
| Transcripts with >15 exons    | 1,864 (4.14 %)  |

**Supplementary Table S16.** *I. nil* lines and their *CONTRACTED* genes for brassinosteroid synthesis

| Line No. | Line                 | Phenotype   | Alleles     | Reference     |
|----------|----------------------|-------------|-------------|---------------|
| AK1      | Tokyo Kokei Standard | <i>CT</i>   | <i>CT</i>   | <sup>14</sup> |
| AK2      | Africa               | <i>CT</i>   | <i>CT</i>   | 21            |
| AK4      | Pekin Tendan         | <i>CT</i>   | <i>CT</i>   | 21            |
| AK5      | KK/ZSK-2             | <i>CT</i>   | <i>CT</i>   | 22            |
| AK13     | Shiranami            | <i>CT</i>   | <i>CT</i>   | 23            |
| AK14     | Akatsuki-no-yuki     | <i>CT</i>   | <i>CT</i>   | 23            |
| AK16     | Orihime              | <i>CT</i>   | <i>CT</i>   | 23            |
| AK17     | Tancho               | <i>CT</i>   | <i>CT</i>   | 23            |
| AK30     | Sagaminoyuki         | <i>CT</i>   | <i>CT</i>   | 23            |
| AK31     | Shirakumo            | <i>CT</i>   | <i>CT</i>   | 23            |
| AK29     | 54Y                  | <i>CT</i>   | <i>CT</i>   | 24            |
| AK30     | Hatsushimo           | <i>CT</i>   | <i>CT</i>   | 24            |
| AK31     | NS/Wca1              | <i>CT</i>   | <i>CT</i>   | 25            |
| AK33     | 78WWc1               | <i>CT</i>   | <i>CT</i>   | 25            |
| AK42     | Hamanosora           | <i>CT</i>   | <i>CT</i>   | 22            |
| AK43     | Hamanokagayaki       | <i>CT</i>   | <i>CT</i>   | 22            |
| AK52     | Scarlet O'hara       | <i>CT</i>   | <i>CT</i>   | 22            |
| AK55     | Unzen                | <i>CT</i>   | <i>CT</i>   | 26            |
| AK56     | Aogakiyama           | <i>CT</i>   | <i>CT</i>   | 27            |
| AK57     | Akatsukinomine       | <i>CT</i>   | <i>CT</i>   | 27            |
| AK58     | Akatsukkinomurasaki  | <i>CT</i>   | <i>CT</i>   | 27            |
| AK59     | Akatsukinoumi        | <i>CT</i>   | <i>CT</i>   | 27            |
| AK60     | Akatsukinonami       | <i>CT</i>   | <i>CT</i>   | 27            |
| AK62     | Violet               | <i>CT</i>   | <i>CT</i>   | 22            |
| Q220     |                      | <i>ct-w</i> | <i>ct-w</i> | this study    |
| Q312     |                      | <i>ct</i>   | <i>ct-2</i> | this study    |
| Q578     |                      | <i>ct-w</i> | <i>ct-w</i> | this study    |
| Q594     |                      | <i>ct</i>   | <i>ct-1</i> | this study    |
| Q606     |                      | <i>ct-w</i> | <i>ct-w</i> | this study    |
| Q611     |                      | <i>ct-w</i> | <i>ct-w</i> | this study    |
| Q629     |                      | <i>ct-w</i> | <i>ct-w</i> | this study    |
| Q646     |                      | <i>ct-w</i> | <i>ct-w</i> | this study    |
| Q787     |                      | <i>ct-w</i> | <i>ct-w</i> | this study    |
| Q807     |                      | <i>ct</i>   | <i>ct-2</i> | this study    |
| Q811     |                      | <i>ct-w</i> | <i>ct-w</i> | this study    |
| Q834     |                      | <i>ct</i>   | <i>ct-2</i> | this study    |
| Q837*    |                      | <i>ct</i>   | <i>ct-2</i> | <sup>28</sup> |
| Q840     |                      | <i>ct</i>   | <i>ct-1</i> | this study    |
| Q848     |                      | <i>ct</i>   | <i>ct-1</i> | this study    |
| Q851     |                      | <i>ct</i>   | <i>ct-2</i> | this study    |
| Q853     |                      | <i>ct</i>   | <i>ct-2</i> | this study    |
| Q854     |                      | <i>ct</i>   | <i>ct-2</i> | this study    |
| Q857     |                      | <i>ct</i>   | <i>ct-2</i> | this study    |

All *I. nil* lines listed here are from the National BioResource Project (<http://www.shigen.nig.ac.jp/asagao/>). \*The Q837 line is heterozygous for the *star* mutation. The *ct* mutants had been classified into *ct* and *ct-w* by their characteristic phenotypes. The phenotypes of *ct* are slightly severer than those of *ct-w*.

**Supplementary Table S17.** Top 10 enriched GO terms in *I. nil* specific gene families

| <b>GO term</b> | <b>Description</b>               | <b>p-value</b> |
|----------------|----------------------------------|----------------|
| GO:0051704     | multi-organism process           | 1.90E-020      |
| GO:0000003     | reproduction                     | 3.30E-019      |
| GO:0009875     | pollen-pistil interaction        | 3.30E-019      |
| GO:0008037     | cell recognition                 | 3.30E-019      |
| GO:0048544     | recognition of pollen            | 3.30E-019      |
| GO:0022414     | reproductive process             | 3.30E-019      |
| GO:0009856     | pollination                      | 3.30E-019      |
| GO:0032501     | multicellular organismal process | 1.10E-016      |
| GO:0007154     | cell communication               | 2.00E-016      |
| GO:0042545     | cell wall modification           | 9.40E-010      |



**Supplementary Table S18.** Genome projects using PacBio sequence data for assembly improvement

| <b>Organism</b>                               | <b>Scaffold N50</b> | <b>Contig N50</b> |
|-----------------------------------------------|---------------------|-------------------|
| PacBio data in later stages of assembly       |                     |                   |
| <i>Conyza canadensis</i> <sup>29</sup>        | 33.5 kb             | 20.7 kb           |
| <i>Saccharina japonica</i> <sup>30</sup>      | 252 kb              | 58.8 kb           |
| <i>Belgica antarctica</i> <sup>31</sup>       | 98.2 kb             | -                 |
| <i>Primula veris</i> <sup>32</sup>            | 164 kb              | 9.4 kb            |
| <i>Nicrophorus vespilloides</i> <sup>33</sup> | 122.4 kb            | 102.1 kb          |
| <i>Lolium perenne</i> <sup>34</sup>           | 70.1 kb             | 16.3 kb           |
| <i>Gossypium barbadense</i> <sup>35</sup>     | 503 kb              | 72 kb             |
| <i>Dendrobium officinale</i> <sup>36</sup>    | 25.1 kb             | 76.4 kb           |
| <i>Glanville fritillaria</i> <sup>37</sup>    | 119 kb              | 13 kb             |
| <i>Notothenia coriiceps</i> <sup>38</sup>     | 129 kb              | 11.6 kb           |
| <i>Lingula anatine</i> <sup>39</sup>          | 294 kb              | 55 kb             |
| <i>Thlaspi arvense</i> <sup>40</sup>          | 140 kb              | 21 kb             |
| PacBio data in contig assembly                |                     |                   |
| <i>Gorilla gorilla</i>                        | 23 Mb               | 9.5 Mb            |
| <i>Lates calcarifer</i>                       | 1.19 Mb             | 1.06 Mb           |
| <i>Vigna angularis</i>                        | -                   | 3.0 Mb            |
| <i>Oropetium thomaeum</i>                     | 2.4 Mb              | 809.2 kb          |

**Supplementary Table S19.** Genome characterizations per pseudo-chromosome

| <b>Chromosome</b> | <b>Anchored Scaffolds</b> | <b>Length (Mb)</b> | <b>RAD markers</b> | <b>Length (cM)</b> | <b>Genes</b> | <b><i>Tpn1</i> Elements</b> |
|-------------------|---------------------------|--------------------|--------------------|--------------------|--------------|-----------------------------|
| 1                 | 16                        | 42.88              | 236                | 68.00              | 2,614        | 11                          |
| 2                 | 29                        | 43.08              | 263                | 80.50              | 2,912        | 22                          |
| 3                 | 22                        | 38.82              | 250                | 61.90              | 2,499        | 23                          |
| 4                 | 25                        | 49.59              | 284                | 70.60              | 3,081        | 28                          |
| 5                 | 20                        | 42.38              | 256                | 67.90              | 2,825        | 13                          |
| 6                 | 21                        | 49.23              | 239                | 116.80             | 2,781        | 14                          |
| 7                 | 13                        | 31.60              | 169                | 64.70              | 2,051        | 7                           |
| 8                 | 20                        | 41.56              | 203                | 72.50              | 2,405        | 18                          |
| 9                 | 21                        | 42.32              | 243                | 66.20              | 2,392        | 21                          |
| 10                | 18                        | 44.12              | 226                | 66.90              | 2,599        | 17                          |
| 11                | 20                        | 39.09              | 219                | 66.30              | 2,621        | 22                          |
| 12                | 31                        | 66.20              | 383                | 119.50             | 3,913        | 51                          |
| 13                | 24                        | 48.82              | 242                | 69.40              | 2,631        | 19                          |
| 14                | 26                        | 59.97              | 302                | 89.00              | 3,871        | 27                          |
| 15                | 15                        | 32.06              | 170                | 52.30              | 1,768        | 11                          |
| Total             | 321                       | 671.72             | 3685               | 1132.50            | 40,963       | 304                         |
| Average           | 21.40                     | 44.78              | 245.67             | 75.50              | 2,730.87     | 20.27                       |

**Supplementary Table S20. Primers and adapters used in this study**

| Gene, BAC clone | Primer, adapter           | Sequence (5' to 3')                                              | Usage                                              |
|-----------------|---------------------------|------------------------------------------------------------------|----------------------------------------------------|
|                 | Ara-1stBG                 | gAgAgAgAgAggATCCAACCCTggAg<br>AgTTTTTTTTTTTTTTTTTVN              | Constructing the JMFF library                      |
|                 | Ara-Hairpin GN5           | ggTTCTCgAgTCATCgCTgTTCCAgAC<br>AgCgATgACTCgAgAACCGNNNNN          | Constructing the JMFF library                      |
|                 | 1st strand                | GAGAGAGAGAGGATCCTTTGGCCC<br>TTATGGCCTACTTTTTTTTTTTTTTTT<br>TVN   | Constructing the JMSF library                      |
|                 | 2nd strand                | GAGAGAGAGAGGATCCTTTGGCCC<br>TTATGGCCATCAC                        | Constructing the JMSF library                      |
|                 | TruSeq_MseI_NdeI_adaptor1 | /5Phos/T*A*GAGATCGGAAGAGCAC<br>ACGTCTGAACTCCAGTC*A*C             | Preparing the RAD libraries                        |
|                 | TruSeq_MseI_NdeI_adaptor2 | G*T*CAAGTTTCACAGCTCTCCGA<br>TC*T*C                               | Preparing the RAD libraries                        |
|                 | TruSeq_BglII_adaptor1     | G*A*TCGGAAGAGCTGTGCAGA*C*<br>T                                   | Preparing the RAD libraries                        |
|                 | TruSeq_BglII_adaptor2     | A*A*TGATACGGCGACCACCGAGA<br>TCTACACTCTTCCCTACACGACG<br>CTCTT*C*C | Preparing the RAD libraries                        |
| <i>TpnA1-4</i>  | AAP                       | GGCCACGCGTCACT-<br>AGTACGGGIIGGGIIGGGIIG                         | cDNA cloning                                       |
| <i>TpnA1-4</i>  | AUAP                      | GGCCACGCGTCGACTAGTAC                                             | cDNA cloning                                       |
| <i>TpnA1-4</i>  | AP                        | GGCCACGCGTCGACTAGTACTTTT<br>TTTTTTTTTTTTTT                       | cDNA cloning                                       |
| <i>TpnA1-4</i>  | seq-771R                  | GGTTGTCTAGTTCATTGAATTGT<br>A                                     | cDNA cloning                                       |
| <i>TpnA1-4</i>  | TNP+100F                  | GGGAATGACATTGATGTTTATTG<br>G                                     | cDNA cloning                                       |
| <i>TpnA1-4</i>  | TNPA15-1R                 | GTATTATTATGACTTGGATGATA                                          | cDNA cloning                                       |
| <i>TpnA1-4</i>  | TNPD4-2R                  | AATTATACACTAGAACTTGCTAC<br>G                                     | cDNA cloning                                       |
| <i>TpnA1-4</i>  | Tpn+2569F                 | GTAATTGGCAGGTTGTTGCTGCTT<br>C                                    | cDNA cloning                                       |
| <i>TpnA1-4</i>  | Tpn113+3073 F             | GAATCTAAGGAGCATGGAGGTCG<br>GG                                    | cDNA cloning                                       |
| <i>TpnA1-4</i>  | Tpn113+3188 F             | GACGACAAGCAACAGTAGAAGAC<br>AG                                    | cDNA cloning                                       |
| <i>TpnA1-4</i>  | Tpn113+3191 R             | CTCTGTCTTCTACTGTTGCTTGTC                                         | cDNA cloning                                       |
| <i>TpnA1-4</i>  | Tpn113+3274 R             | CCTTTCAGTACAACCTCCCTTTTC                                         | cDNA cloning                                       |
| <i>CYP90C1</i>  | InCYP90-Fw1               | TGAGAACGTATGTGGTTTTGGA                                           | Amplify <i>InCYP90C1</i> coding region, and RT-PCR |
| <i>CYP90C1</i>  | InCYP90-Rv1               | ACAATCGTTTCCCTGGTTGA                                             | Amplify <i>InCYP90C1</i> coding region, and RT-PCR |

|                |               |                                  |                                                                               |
|----------------|---------------|----------------------------------|-------------------------------------------------------------------------------|
| <i>CYP90C1</i> | InCYP90-Fw3   | ACGGGAAGATAACCATTGCTG            | Amplify <i>InCYP90C1</i> promoter region                                      |
| <i>CYP90C1</i> | InCYP90-Rv3   | ATCCGGTTTTCTCGTCTCCT             | Amplify <i>InCYP90C1</i> promoter region                                      |
| <i>CYP90C1</i> | InCYP90-Fw4   | GTTGAATTCGGGGAAGAAT              | Amplify <i>InCYP90C1</i> 3' and downstream region                             |
| <i>CYP90C1</i> | InCYP90-Rv4   | ACCCAACGTTTAGTGCATGA             | Amplify <i>InCYP90C1</i> 3' and downstream region                             |
| <i>CYP90C1</i> | InCYP90-Fw6   | CACGTGTGACATGGTTTGGT             | Amplify <i>Tpn15</i> insertion site of the <i>ct-1</i> and <i>ct-2</i> allele |
| <i>CYP90C1</i> | InCYP90-Rv6   | TGGTTGGGGAAGTGAGTAGG             | Amplify <i>Tpn15</i> insertion site of the <i>ct-1</i> and <i>ct-2</i> allele |
| <i>CYP90C1</i> | InCYP90-Fw11  | TGATGCTCTGACTGCAAAAAGG           | Amplify <i>Tpn16</i> insertion site of the <i>ct-w</i> allele                 |
| <i>CYP90C1</i> | InCYP90-Rv5   | GGTTTCCCAACAAGTGTGT              | Amplify <i>Tpn16</i> insertion site of the <i>ct-w</i> allele                 |
| <i>GAPDH</i>   | ipgap-forward | GCTTTAAGCCTCCGCCATGGG            | RT-PCR                                                                        |
| <i>GAPDH</i>   | ipgap-reverse | ACGTTGGAAGCAATAAGCCCTTAA<br>GCAG | RT-PCR                                                                        |
| <i>CYP90B1</i> | INCYP90B1-F1  | GGAGGAAGTCTGCAGTCAGCT            | RT-PCR                                                                        |
| <i>CYP90B1</i> | INCYP90B1-R1  | CAATTCTGATCTGTCACCTTCTGCT        | RT-PCR                                                                        |
| <i>CYP90A1</i> | INCYP90A1-F3  | CCATGGAGTCATTGAATCTTCTT          | RT-PCR                                                                        |
| <i>CYP90A1</i> | INCYP90A1-R2  | GGAAGTGTGGCCTCAAATGT             | RT-PCR                                                                        |
| <i>CYP90A2</i> | INCYP90A2-F1  | GCTTTCTCCTTTAGCTGTTTTGGT         | RT-PCR                                                                        |
| <i>CYP90A2</i> | INCYP90A2-R1  | TGCATCTACTAACACTCACTCTT          | RT-PCR                                                                        |
| <i>DET2</i>    | INDET2-F1     | AGAGATCCTTCCAGGTTGAAGA           | RT-PCR                                                                        |
| <i>DET2</i>    | INDET2-R1     | CAATCCAATTGCCATCACATTACT<br>AC   | RT-PCR                                                                        |
| <i>CYP90D1</i> | INCYP90D1-F3  | AACATCCCAATATGGACACCA            | RT-PCR                                                                        |
| <i>CYP90D1</i> | INCYP90D1-R1  | GAGACGATACTGAAGAAAAGATG<br>TGT   | RT-PCR                                                                        |
| <i>CYP85A1</i> | INCYP85A1-F1  | GCCTTGAAAAGCGAAAACACCA           | RT-PCR                                                                        |
| <i>CYP85A1</i> | INCYP85A1-R1  | GTGCTGTACATTTATTGAGTGATG<br>G    | RT-PCR                                                                        |
| <i>CYP85A2</i> | INCYP85A2-F1  | GTAGAGCTACTTAGCTTCATCA           | RT-PCR                                                                        |
| <i>CYP85A2</i> | INCYP85A2-R1  | GTGGTATGTCCTTTTCTGTACA           | RT-PCR                                                                        |

|                |              |                                  |                       |
|----------------|--------------|----------------------------------|-----------------------|
| <i>CYP85A3</i> | INCYP85A3-F1 | GAAGCTTCTTGGGAGGCCATT            | RT-PCR                |
| <i>CYP85A3</i> | INCYP85A3-R1 | GTACATTCTCTGACTCATTGATG          | RT-PCR                |
| JMHiBa001I06   | InCHI-B-F2   | TGCAAATGTGGGTGGGATGATC           | BAC library screening |
| JMHiBa001I06   | InCHI-B-R1   | ACTCCATAGGATCACCAA*ACTCTC        | BAC library screening |
| JMHiBa001L04   | C1865 LF1    | GTGTAGGCTAGCTGGATAAGCCT          | BAC library screening |
| JMHiBa001L04   | C1865 R5     | CCACCAGTGAGCCATAGCAAGAG          | BAC library screening |
| JMHiBa010C11   | XRN3-F1      | CCTGGTGAAGGGGAACACAA             | BAC library screening |
| JMHiBa010C11   | XRN3-R3      | CTCTGATGCAAGCGTGCTCT             | BAC library screening |
| JMHiBa15I14    | TpnA1-Fw1    | TGCAGCCATGTCATGTAGGT             | BAC library screening |
| JMHiBa15I14    | TpnA1-Rv1    | AATAGGCCGGTTGGATCATA             | BAC library screening |
| JMHiBa037CJ13  | XRN4-F1      | ATGGAGTGGCTCCTAGAGCTA            | BAC library screening |
| JMHiBa037CJ13  | XRN4-R3      | ATCTACGCCACGACAGTCA              | BAC library screening |
| JMHiBa038C09   | TNPA14-F1    | GACTTTAATTGAGAACATGCCGGA         | BAC library screening |
| JMHiBa038C09   | TNPA15-4R    | TATTCCATAATCTCAAACATCTTTG<br>TTC | BAC library screening |

---

The asterisks indicate phosphorothioate bonds.

**Supplementary Table S21.** Tissues for the extraction of RNA for transcriptome analysis

| <b>Tissues</b> | <b>Sampling condition</b>                                                                                                                                                                                                                                     |
|----------------|---------------------------------------------------------------------------------------------------------------------------------------------------------------------------------------------------------------------------------------------------------------|
| Flowers        | Tissues include sepals, petals, stamens, and carpels with short peduncles. Fully opened flowers, large flower buds (1–3 days before flower opening), and small flower buds (more than 4 days before flower opening) were separately collected in the evening. |
| Leaves         | Various-sized leaves with short peduncles were mixed. Samplings were done at 4:30 on October 5, 2011 and at 14:30 on January 11, 2012.                                                                                                                        |
| Stems          | Young stems, including the tips.                                                                                                                                                                                                                              |
| Seed coats     | Seed coats on immature seeds in various developmental stages were mixed.                                                                                                                                                                                      |
| Embryos        | Immature green embryos. Small embryos without bending cotyledon and large embryos with bending cotyledons were separately collected and subjected to RNA extraction.                                                                                          |
| Roots          | Three-week-old roots cultured in vermiculite.                                                                                                                                                                                                                 |

Flowers, leaves, stems, and seed coats are from a mature TKS plant using a whole genome shotgun sequence. Embryo and roots are from the progeny of the plant.

**Supplementary Table S22.** Comparison of the RAD-seq and the classical linkage map

| <b>Chromosome</b> | <b>LGs on classical map</b> | <b>RAD group</b> | <b>Marker gene</b> | <b>Scaffold</b> | <b>Reference or accession number</b> |
|-------------------|-----------------------------|------------------|--------------------|-----------------|--------------------------------------|
| 1                 | classic 1                   | RAD 1            | <i>CONTORTED</i>   | BDFN01003030    | AB302068                             |
| 2                 | classic 2                   | RAD 13           | <i>FEATHERED</i>   | BDFN01003169    | 41                                   |
| 3                 | classic 3N                  | RAD 10           | <i>DUSKY</i>       | BDFN01001421    | 26                                   |
| 4                 | classic 4                   | RAD 14           | <i>MAGENTA</i>     | BDFN01002848    | 22                                   |
| 5                 | classic 5                   | RAD 12           | <i>A3</i>          | BDFN01000805    | 42                                   |
| 6                 | classic 6                   | RAD 2            | <i>DUPLICATE</i>   | BDFN01003069    | 43                                   |
| 7                 | classic 7                   | RAD 6            |                    |                 |                                      |
| 8                 | classic 8                   | RAD 3            |                    |                 |                                      |
| 9                 | classic 9                   | RAD 4            |                    |                 |                                      |
| 10                | classic 10                  | RAD 11           | <i>DUSKISH</i>     | BDFN01001043    | 44                                   |
| 11                | classic 3S                  | RAD 11           | <i>CI</i>          | BDFN01003238    | 25                                   |
| 11                | classic 3S                  | RAD 15           | <i>SPECKLED</i>    | BDFN01001416    | 45                                   |
| 12                |                             | RAD 5            |                    |                 |                                      |
| 13                |                             | RAD 8            |                    |                 |                                      |
| 14                |                             | RAD 7            |                    |                 |                                      |
| 15                |                             | RAD 9            |                    |                 |                                      |

**Supplementary Table S23. Starter materials for the EST analysis**

| <b>Tissues</b>       | <b>Sampling condition</b>                                                                                                                                                                                                                                                                                          |
|----------------------|--------------------------------------------------------------------------------------------------------------------------------------------------------------------------------------------------------------------------------------------------------------------------------------------------------------------|
| Flowers, flower buds | Plant was grown in a greenhouse. Tissues include sepals, petals, stamens and carpels with short peduncles. Fully opened flowers and flower buds at 6 different stages were collected separately. The stages were 12 h and 36 h before flower opening, 30–40 mm, 20–30 mm, 10–20 mm, and less than 10 mm in length. |
| Seedlings            | Plants were grown in a growth chamber, Biotron LH300 (Nippon Medical and Chemical Instruments) set to 28 °C. Aerial parts of the 8-day-old seedlings were collected. The light conditions were continuous light, 16 h light and 3 h dark after continuous light, and 10 h dark after continuous light.             |
| Seed coats           | Seed coats on immature seeds in various developmental stages were mixed. Plant was grown in a greenhouse.                                                                                                                                                                                                          |



**Supplementary Table S24.** EST libraries

| <b>Library name</b> | <b>Clones</b> | <b>Origin</b>        | <b>End</b> | <b>ESTs</b>   | <b>Accession number</b>                |
|---------------------|---------------|----------------------|------------|---------------|----------------------------------------|
| JMFF                | 18,533        | flowers, flower buds | 5'         | 17,253        | BJ553078–BJ566016<br>HY922663–HY926976 |
|                     |               |                      | 3'         | 16,947        | BJ566017–BJ578976<br>HY918676–HY922662 |
| JMFN                | 9,011         | flowers, flower buds | 5'         | 9,011         | HY926977–HY935987                      |
| JMFS                | 13,068        | flowers, flower buds | 5'         | 13,068        | HY935988–HY949055                      |
| JMSF                | 19,476        | Seedling             | 5'         | 18,627        | CJ736987–CJ755610<br>HY949058–HY949060 |
|                     |               |                      | 3'         | 17,714        | CJ755611–CJ773322<br>HY949056–HY949057 |
| JMCP                | 1,038         | seed coat            | 5'         | 479           | HY918197–HY918675                      |
|                     |               |                      | 3'         | 592           | HY917605–HY918196                      |
| <b>Total</b>        | <b>61,126</b> |                      |            | <b>93,691</b> |                                        |

## **Supplementary Methods**

### **DNA isolation**

Genomic DNA for the shotgun sequence analysis was extracted from flower petals of young buds. Young buds were collected, frozen with liquid nitrogen, and stored at -80 °C until use. The 3-g sample was grounded to powder in liquid nitrogen with a mortar and pestle. The powder was dissolved quickly in 20 ml of Carlson lysis buffer preheated to 80 °C. The buffer was vigorously stirred with a hot magnetic stirrer and stir bar, and included 100 mM Tris-HCl (pH 9.5), 2 % CTAB (cetyltrimethylammonium bromide), 1.4 M NaCl, 1 % PEG6000, 20 mM EDTA (ethylenediaminetetraacetic acid), and 0.25 %  $\beta$ -mercaptoethanol. The extract was transferred to a 50-ml tube and incubated at 60 °C for 1 h on a water bath with shaking at 120 rpm. The sample was cooled to room temperature, and then 20 ml of chloroform/isoamyl alcohol (24:1) was added; it was mixed with a vortex mixer and rotated slowly with an overhead tube rotator. The extract was centrifuged at 8,000 g for 15 min at 4 °C. The aqueous phase was transferred into a fresh 50-ml tube, and 20  $\mu$ l of 10 mg/ml RNase A (Nippon Gene) was added. After incubation for 30 min at 37 °C, 20 ml of Milli-Q was added to the sample, and the pH was adjusted to 7.0 with 25 % HCl. Genomic DNA was purified using a Genomic-tip 500/G (Qiagen) in accordance with the manufacturer's protocol and was resolved in 150  $\mu$ l of Milli-Q.

To characterize the *CT* gene, genomic DNA was isolated from the leaves by either the NA-2000 or PI-480 (Kurabo) automated DNA isolation systems.

### **RNA isolation**

Samples were collected, immediately frozen using liquid nitrogen, and stored at -80 °C until use. For RNA-seq analysis of the six tissues (Supplementary Table S21), RNA was extracted using a Get pureRNA Kit (Dojindo Molecular Technologies) and purified using an RNeasy Plant Mini Kit (Qiagen) in accordance with the manufacturer's protocols. To analyze *CT* expression and to isolate *TnpA* and *TnpD* transcripts, RNA was extracted using an RNeasy Plant Mini Kit (Qiagen).

Total RNA subjected to cDNA library constructions was isolated from tissues using a guanidinium isothiocyanate extraction buffer and purified by CsCl (cesium chloride) centrifugation. The tissues and stages of the sample are listed in Supplementary Table S23. Each 1-g sample was ground to powder in liquid nitrogen with a mortar and pestle, 10 ml of the extraction buffer was added, and it was then homogenized using an ultra disperser T25-S2 (IKA). The buffer contained 4 M guanidinium isothiocyanate, 0.1 M Tris-HCl, and 1 %  $\beta$ -mercaptoethanol, and the pH was adjusted to 7.0 using HCl. The samples were centrifuged at 12,000 g for 10 min at 4 °C. The supernatant was transferred to a new tube, to which a 0.025 volume of 1 M acetic acid and a 0.75 volume of ethanol were added; it was then chilled at -30 °C and centrifuged at 12,000 g for 20 min at 4 °C. The pellet was washed twice with 10 ml of 70 % EtOH and suspended in a sarkosyl buffer in a water bath set to 68 °C. The buffer contained 1 % (w/v) sodium lauroyl sarcosinate and 10 mM Tris-HCl; the pH was adjusted to 7.0 using HCl. The sample was then centrifuged at 8,000 g for 20 min at 4 °C. The supernatant was transferred to a new tube, and the volume was adjusted to 3 ml using the sarkosyl buffer before adding 3 g of CsCl. The sample was layered on a cushion of 1.25 ml of 5.7 M CsCl in the sarkosyl buffer and centrifuged at 21,000 g for 12 h at 4 °C using an RPS50-2 rotor (Beckman). The pellet was dissolved in 400  $\mu$ l of Milli-Q; 40  $\mu$ l of 3-M

sodium acetate (pH 5.2) and a 0.75 volume of ethanol were added, it was chilled at -30 °C, and was centrifuged at 20,000 g for 15 min at 4 °C. The pellet was then washed twice with 70 % EtOH, air-dried, and dissolved in Milli-Q.

### **cDNA library construction**

The cDNA libraries made are listed in Supplementary Table S24. The JMFS, JMFN, and JMFF libraries were derived from mixtures of flowers and flower buds of the TKS line. JMSF and JMCP libraries were constructed from seedlings and seed coats, respectively, of TKS.

JMFS and JMFN stand for Japanese morning glory flower size-selected and normalized respectively. These libraries were constructed as described before<sup>1</sup>. Poly (A)+ RNA was purified using a Poly (A)+ RNA Quick mRNA Isolation Kit (Stratagene), and cDNAs were synthesized using a ZAP-cDNA Synthesis Kit (Stratagene) in accordance with the manufacturer's instructions. cDNA fragments with sequences 3 kb or longer were selected for the JMFS library and those ranging in lengths from 0.5 to 3 kb were normalized for the JMFN library, as described<sup>1</sup>. The size-selected and normalized cDNA fragments were separately cloned into the pBluescript II KS (+) (Stratagene) and transformed into *E. coli* DH10B. Each cDNA was cloned as an *Eco*RI and *Xho*I cassette.

JMFF and JMSF stand for Japanese morning glory flower full-length and Japanese morning glory seedling full-length respectively. These libraries house full-length-enriched cDNA. The cDNA was synthesized with trehalose-thremoactivated reverse transcriptase<sup>2</sup>, and the CAP trapper method<sup>3,4</sup> was applied to select full-length cDNAs. For the JMFF library, Poly (A)+ RNA was purified using a Poly (A)+ RNA Quick

mRNA Isolation Kit (Stratagene). The primers of Ara-1stBG and Ara-Hairpin GN5 were used to synthesize the first and second strand cDNA respectively. The fragments were digested with *Xho*I and cloned into the *Sal*I site of the  $\lambda$ FLC-I vector<sup>5</sup>.

Construction of the JMSF library was ordered to Danaform. First and second strand cDNA was synthesized using 1st strand and 2nd strand primers respectively. One round of normalization was performed, as described<sup>6</sup>, and they were then cloned into the  $\lambda$ FLC-III vector<sup>5</sup>. The  $\lambda$  vector clones were subsequently converted into pFLC-I and pFLC-III phagemid derivatives by *in vivo* excision and transformed into phage resistant *E. coli* DH10B T1.

JMCP stand for Japanese morning glory seed coat PCR, and the JMCP library was constructed using the SMART cDNA Library Construction Kit (Clontech) in accordance with the manufacturer's protocol, with slight modification. After cDNA synthesis using long-distance PCR, the amplified cDNA fragments were cloned into pCR-XL-TOPO (Invitrogen) and transformed into *E. coli* TOP10.

### **EST analysis**

Plasmid DNA was prepared from cDNA clones that were randomly chosen from the cDNA libraries. The 5'- and 3'-end sequences of the clones were determined using the ABI Prism 3100 Genetic Analyzer and ABI Prism 3700 Genetic Analyzer with BigDye version 3.1 chemistry (Applied Biosystems). The numbers of the clones analyzed as well as those of the obtained EST sequences are listed in Supplementary Table S24.

### **BAC library construction and end sequence**

Construction of the BAC library was ordered to Clemson University Genomics Institute. Genomic DNA was isolated from pooled plants of TKS. *Bam*HI-digested DNA fragments were cloned into the pIndigoBAC536 vector and transformed into *E. coli* DH10B. A total of 27,648 clones were obtained. The average insert size was estimated to be approximately 100 kb. Of these clones, 5'- and 3'-ends of 23,424 clones were subjected to sequencing. BAC DNA was isolated from the clones and analyzed using an ABI Prism 3700 Genetic Analyzer with BigDye version 3.1 chemistry (Applied Biosystems). The BAC library was screened using a systematic PCR-based procedure, and six BAC clones—JMHiBa001I06, JMHiBa001L04, JMHiBa010C11, JMHiBa15I14, JMHiBa037J13, and JMHiBa038C09—were obtained. Of these, JMHiBa15I14 carries *TpnA1*, and the *TpnA1* sequence was analyzed using an ABI Prism 3100 Genetic Analyzer with BigDye version 3.1 chemistry (Applied Biosystems). The entire sequences of the remaining five BAC clones were sequenced using a shotgun sequencing procedure and were used for genome assembly validation.

### **Organelar genome sequence and annotation**

BAC clones carrying the chloroplast and mitochondria genome fragments were selected by using the end sequences of the BAC clones. The clones are JMHiBa067I20, JMHiBa023J09, JMHiBa018N16, JMHiBa001E21 and JMHiBa032B12 for chloroplast genome and JMHiBa064B05, JMHiBa013H19, JMHiBa027O13, JMHiBa054N18 and JMHiBa056N18 for mitochondria genome. Shotgun libraries for the selected BAC clones were constructed and the shotgun clone sequences were determined using the ABI Prism 3700 Genetic Analyzer with BigDye version 3.1 chemistry (Applied Biosystems). The reads were analyzed with KB basecaller (KB1.2, Applied Biosystems)

for base calling, Phrap (v1.080812)<sup>7</sup> for assembling and Consed (v23.0)<sup>8</sup> for displaying and editing the assembled sequence. The assembled chloroplast and mitochondria genomes were annotated using DOGMA<sup>9</sup> and MITOFY<sup>10</sup> respectively. Initiation and stop codons as well as intron/exon boundaries were manually corrected. The published partial chloroplast genome of *I. nil* line REM459 (KF242487)<sup>11</sup> was used as a reference for manual correction. The organellar genome maps were generated using OrganellarGenomeDRAW<sup>12,13</sup>.

Leaving out the partial and smaller overlapping contigs, the chloroplast and mitochondrial sequences were able to be completely reconstructed from just five and three sequences respectively in the PacBio based assembly. One of the three mitochondrial sequences (approximately 244 kb), which was merged as a chimeric mis-assembly with the end of a chromosomal contig, was separated manually prior to scaffolding.

### **Mis-assembly elimination at the contig level**

When mis-assemblies, as predicted using linkage maps, occurred at the contig level rather than the scaffold level, the following method was followed to split the scaffolds. At the contig level, since there are no gap boundaries, it would be impossible to locate the exact junction point without a reference sequence. Hence, i) a larger chimeric region was identified using linkage maps; and ii) two breakpoints were induced at each side of the chimeric regions splitting the scaffold into 3 parts. The first part would map to one chromosome (linkage group), and the last part would map to a different chromosome, while the middle part would still remain chimeric; however, the length was narrowed to as short as possible. The following three cases were used to find the breakpoints in

chimeric regions: 1) the last base position, where both pairs of the BAC-end reads were concordantly mapped, 2) the last base position of a BAC-end pair where only one read was mapped near the scaffold, and 3) the base position after the SNP marker from the linkage maps (Supplementary Fig. S7). The breakpoints were then manually split to resolve mis-assembled contigs. Breakpoints were induced at positions, when there are at least 2 markers in a scaffold corresponding to two different pseudo-chromosomes from the linkage maps. The conservative strategy may lead to unnecessary contig breaking, with the tradeoff being shortening in contig lengths, however, the process ensures that there will be fewer mis-assemblies.

### **Isolation of the *TnpA* and *TnpD* transcripts**

To isolate the transcripts derived from autonomous *Tpn1* family transposons, total RNA was extracted from the Q1072 strain, where *Tpn1* actively transposes. Primers were designed from a series of defective *Tpn1* family transposons<sup>14</sup> (Supplementary Fig. S20 and Supplementary Table S20). Sequence homology between defective *Tpn1* family transposons and other plant CACTA elements revealed that *Tpn113* contains a large part of the *TnpA* gene. Reverse transcription-PCR (RT-PCR) was performed using SuperScript First-Strand Synthesis System (Invitrogen) in accordance with the manufacturer's protocols. The 3.2-kb fragment was amplified with TNP+100F and Tpn113+3191R. TNPD4-2R was designed from this sequence. TNPD4-2R and Tpn+2569F were used to amplify the *TnpD* transcript. Using TNPA15-1R and Tpn+2569F, the *TnpA* transcript was obtained. 5'-RACE (rapid amplification of cDNA ends) was performed using 5'-RACE systems (Invitrogen) in accordance with the manufacturer's protocols. The reverse-transcription step was performed using



Tpn113+3274R. AAP (Abridge Anchor Primer) and Tpn113+3191R were used for the first amplification, and AUAP (Abridge Universal Anchor Primer) and seq-771R were used for the nested amplification. Tpn+2569F was designed from this sequence. 3'-RACE was performed using 3'-RACE systems (Invitrogen) in accordance with the manufacturer's protocols. Reverse transcription was used for the AP adapter primer. PCR was performed using Tpn113+31073F and AUAP pairs for the first PCR and Tpn113+3188F and AUAP pairs for the second PCR. TNPA15-1R was designed from this sequence. All cDNA sequences derived from putative autonomous *Tpn1* transposons were consistently compiled as full-length *TnpA* and *TnpD* transcripts.

## Supplementary References

1. Asamizu, E., Nakamura, Y., Sato, S. & Tabata, S. A large scale analysis of cDNA in *Arabidopsis thaliana*: generation of 12,028 non-redundant expressed sequence tags from normalized and size-selected cDNA libraries. *DNA Res.* **7**, 175–180 (2000).
2. Carninci, P. *et al.* Thermostabilization and thermoactivation of thermolabile enzymes by trehalose and its application for the synthesis of full length cDNA. *Proc. Natl. Acad. Sci. U. S. A.* **95**, 520–524 (1998).
3. Carninci, P. *et al.* High-efficiency full-length cDNA cloning by biotinylated CAP trapper. *Genomics* **37**, 327–336 (1996).
4. Carninci, P. *et al.* High efficiency selection of full-length cDNA by improved biotinylated cap trapper. *DNA Res.* **4**, 61–66 (1997).
5. Carninci, P. *et al.* Balanced-size and long-size cloning of full-length, cap-trapped cDNAs into vectors of the novel lambda-FLC family allows enhanced gene discovery rate and functional analysis. *Genomics* **77**, 79–90 (2001).
6. Carninci, P. *et al.* Normalization and subtraction of cap-trapper-selected cDNAs to prepare full-length cDNA libraries for rapid discovery of new genes. *Genome Res.* **10**, 1617–1630 (2000).
7. Ewing, B. & Green, P. Base-calling of automated sequencer traces using *phred*. II. Error probabilities. *Genome Res.* **8**, 186–194 (1998).
8. Gordon, D., Abajian, C. & Green, P. Consed: A graphical tool for sequence finishing. *Genome Res.* **8**, 195–202 (1998).
9. Wyman, S. K., Jansen, R. K. & Boore, J. L. Automatic annotation of organellar genomes with DOGMA. *Bioinformatics* **20**, 3252–3255 (2004).

10. Alverson, A. J. *et al.* Insights into the evolution of mitochondrial genome size from complete sequences of *Citrullus lanatus* and *Cucurbita pepo* (Cucurbitaceae). *Mol. Biol. Evol.* **27**, 1436–1448 (2010).
11. Eserman, L. A., Tiley, G. P., Jarret, R. L., Leebens-Mack, J. H. & Miller, R. E. Phylogenetics and diversification of morning glories (tribe Ipomoeae, Convolvulaceae) based on whole plastome sequences. *Am. J. Bot.* **101**, 92–103 (2014).
12. Lohse, M., Drechsel, O. & Bock, R. OrganellarGenomeDRAW (OGDRAW): A tool for the easy generation of high-quality custom graphical maps of plastid and mitochondrial genomes. *Curr. Genet.* **52**, 267–274 (2007).
13. Lohse, M., Drechsel, O., Kahlau, S. & Bock, R. OrganellarGenomeDRAW--a suite of tools for generating physical maps of plastid and mitochondrial genomes and visualizing expression data sets. *Nucleic Acids Res.* **41**, w575-w581 (2013).
14. Kawasaki, S. & Nitasaka, E. Characterization of *Tpn1* family in the Japanese morning glory: *En/Spm*-related transposable elements capturing host genes. *Plant Cell Physiol.* **45**, 933–944 (2004).
15. Doležel, J., Sgorbati, S. & Lucretti, S. Comparison of three DNA fluorochromes for flow cytometric estimation of nuclear DNA content in plants. *Physiol. Plant.* **85**, 625–631 (1992).
16. Ito, M. *et al.* Genome and chromosome dimensions of *Lotus japonicus*. *J. Plant Res.* **113**, 435–442 (2000).
17. Larkin, M. A. *et al.* Clustal W and Clustal X version 2.0. *Bioinformatics* **23**, 2947–2948 (2007).
18. Marchler-Bauer, A. *et al.* CDD: NCBI's conserved domain database. *Nucleic*

- Acids Res.* **43**, D222–D226 (2014).
19. Tamura, K. *et al.* MEGA5: molecular evolutionary genetics analysis using maximum likelihood, evolutionary distance, and maximum parsimony methods. *Mol. Biol. Evol.* **28**, 2731–2739 (2011).
  20. Popendorf, K., Tsuyoshi, H., Osana, Y. & Sakakibara, Y. Murasaki: a fast, parallelizable algorithm to find anchors from multiple genomes. *PLoS One* **5**, e12651 (2010).
  21. Ly, T. *et al.* Development of EST-SSR markers of *Ipomoea nil*. *Breed. Sci.* **62**, 99–104 (2012).
  22. Hoshino, A. *et al.* Spontaneous mutations of the flavonoid 3'-hydroxylase gene conferring reddish flowers in the three morning glory species. *Plant Cell Physiol.* **44**, 990–1001 (2003).
  23. Hoshino, A., Park, K. I. & Iida, S. Identification of *r* mutations conferring white flowers in the Japanese morning glory (*Ipomoea nil*). *J. Plant Res.* **122**, 215–222 (2009).
  24. Abe, Y., Hoshino, A. & Iida, S. Appearance of flower variegation in the mutable *speckled* line of the Japanese morning glory is controlled by two genetic elements. *Genes. Genet. Syst.* **72**, 57–62 (1997).
  25. Morita, Y., Saitoh, M., Hoshino, A., Nitasaka, E. & Iida, S. Isolation of cDNAs for R2R3-MYB, bHLH and WDR transcriptional regulators and identification of *c* and *ca* mutations conferring white flowers in the Japanese morning glory. *Plant Cell Physiol.* **47**, 457–470 (2006).
  26. Morita, Y. *et al.* Japanese morning glory *dusky* mutants displaying reddish-brown or purplish-gray flowers are deficient in a novel glycosylation enzyme for

- anthocyanin biosynthesis, UDP-glucose:anthocyanidin 3-*O*-glucoside-2"-*O*-glucosyltransferase, due to 4-bp insertions. *Plant J.* **42**, 353–363 (2005).
27. Ting Sen, L., Norio, S., Masato, Y., Atsushi, S. & Toshio, H. Acylated peonidin glycosides in the violet-blue cultivars of *Pharbitis nil*. *Phytochemistry* **31**, 659–663 (1992).
  28. Suzuki, Y. *et al.* A dwarf mutant strain of *Pharbitis nil*, Urukobito (*kobito*), has defective brassinosteroid biosynthesis. *Plant J.* **36**, 401–410 (2003).
  29. Peng, Y. *et al.* De novo genome assembly of the economically-important weed Horseweed using integrated data from multiple sequencing platforms. *Plant Physiol.* **166**, 1241–1254 (2014).
  30. Ye, N. *et al.* *Saccharina* genomes provide novel insight into kelp biology. *Nat. Commun.* **6**, 6986 (2015).
  31. Kelley, J. L. *et al.* Compact genome of the Antarctic midge is likely an adaptation to an extreme environment. *Nat. Commun.* **5**, 4611 (2014).
  32. Nowak, M. D. *et al.* The draft genome of *Primula veris* yields insights into the molecular basis of heterostyly. *Genome Biol.* **16**, 12 (2015).
  33. Cunningham, C. B. *et al.* The genome and methylome of a beetle with complex social behavior, *Nicrophorus vespilloides* (Coleoptera: Silphidae). *Genome Biol. Evol.* **7**, 3383–3396 (2015).
  34. Byrne, S. L. *et al.* A synteny-based draft genome sequence of the forage grass *Lolium perenne*. *Plant J.* **84**, 816–826 (2015).
  35. Liu, X. *et al.* *Gossypium barbadense* genome sequence provides insight into the evolution of extra-long staple fiber and specialized metabolites. *Sci. Rep.* **5**, 14139 (2015).

36. Yan, L. *et al.* The genome of *Dendrobium officinale* illuminates the biology of the important traditional Chinese orchid herb. *Mol. Plant* **8**, 922–934 (2015).
37. Ahola, V. *et al.* The Glanville fritillary genome retains an ancient karyotype and reveals selective chromosomal fusions in Lepidoptera. *Nat. Commun.* **5**, 4737 (2014).
38. Shin, S. *et al.* The genome sequence of the Antarctic bullhead notothen reveals evolutionary adaptations to a cold environment. *Genome Biol.* **15**, 468 (2014).
39. Luo, Y. J. *et al.* The *Lingula* genome provides insights into brachiopod evolution and the origin of phosphate biomineralization. *Nat. Commun.* **6**, 8301 (2015).
40. Dorn, K. M., Fankhauser, J. D., Wyse, D. L. & Marks, M. D. A draft genome of field pennycress (*Thlaspi arvense*) provides tools for the domestication of a new winter biofuel crop. *DNA Res.* **22**, 121–131 (2015).
41. Iwasaki, M. & Nitasaka, E. The *FEATHERED* gene is required for polarity establishment in lateral organs especially flowers of the Japanese morning glory (*Ipomoea nil*). *Plant Mol. Biol.* **62**, 913–925 (2006).
42. Inagaki, Y., Hisatomi, Y., Suzuki, T., Kasahara, K. & Iida, S. Isolation of a *Suppressor-mutator/Enhancer*-like transposable element, *Tpn1*, from Japanese morning glory bearing variegated flowers. *Plant Cell* **6**, 375–383 (1994).
43. Nitasaka, E. Insertion of an *En/Spm*-related transposable element into a floral homeotic gene *DUPLICATED* causes a double flower phenotype in the Japanese morning glory. *Plant J.* **36**, 522–531 (2003).
44. Morita, Y., Ishiguro, K., Tanaka, Y., Iida, S. & Hoshino, A. Spontaneous mutations of the UDP-glucose:flavonoid 3-*O*-glucosyltransferase gene confers pale- and dull-colored flowers in the Japanese and common morning glories.

*Planta* **242**, 575–587 (2015).

45. Hoshino, A., Johzuka-Hisatomi, Y. & Iida, S. Gene duplication and mobile genetic elements in the morning glories. *Gene* **265**, 1–10 (2001).
